# Supplementary material for: Biochemical characterization and inhibition of thermolabile hemolysin from Vibrio parahaemolyticus by phenolic compounds
Source: PeerJ. 2021 Jan 6;9:e10506. doi: 10.7717/peerj.10506 (PMC7796666; doi:10.7717/peerj.10506)
Supplement: File S4 [file peerj-09-10506-s004.xlsx]

## Sheet: Fig1C
			Enzymatic activity of VpTLH
			Absorbance (410 nm)
	t(s)	Control	1	2	3
	0.05	0.00097124	0.0060196	0.0154346	0.0271897
	5.05	0.00100188	0.0212977	0.0345782	0.0477011
	10.05	0.00258212	0.0514166	0.0541406	0.0661947
	15.05	0.000942988	0.0627511	0.0745112	0.0863192
	20.05	-0.000133603	0.0874762	0.095003	0.114757
	25.05	0.000796931	0.10577	0.117569	0.134771
	30.05	0.00138072	0.12614	0.143428	0.151405
	35.05	0.00114017	0.151138	0.167905	0.175068
	40.05	0.00222856	0.174318	0.195442	0.199786
	45.05	0.00116005	0.201296	0.221561	0.2258
	50.05	0.00186915	0.229596	0.249938	0.253683
	55.05	0.0021662	0.257455	0.27802	0.281298
	60.05	0.000826445	0.287521	0.306566	0.310927
	65.05	0.00130563	0.315801	0.33626	0.340494
	70.05	0.000733995	0.344602	0.364565	0.365443
	75.05	0.000473117	0.372728	0.392278	0.393888
	80.05	0.00242227	0.399557	0.419623	0.422763
	85.05	0.00149975	0.424643	0.444107	0.449201
	90.05	0.00334385	0.449507	0.469201	0.475848
	95.05	0.000914763	0.474429	0.492337	0.50107
	100.05	0.000849087	0.497285	0.513657	0.525287
	105.05	-0.000408754	0.5197	0.534179	0.54972
	110.05	-0.000182509	0.540939	0.55396	0.572503
	115.05	-0.00027446	0.560614	0.571184	0.592636
	120.05	0.000281161	0.578682	0.587999	0.61347
	125.05	0.000236507	0.595281	0.60329	0.634256
	130.05	-0.000936218	0.610049	0.617057	0.653374
	135.05	-0.00012646	0.625623	0.629856	0.669911
	140.05	0.00052811	0.639046	0.643452	0.686559
	145.05	0.000365586	0.651534	0.655627	0.700449
	150.05	0.000912481	0.664116	0.664011	0.715002
	155.05	0.00150048	0.674737	0.672524	0.727989
	160.05	0.00112631	0.685081	0.680127	0.738711
	165.05	0.000850098	0.696789	0.68937	0.750045
	170.05	0.00109947	0.706369	0.695961	0.761478
	175.05	0.00145032	0.713692	0.701971	0.772139
	180.05	0.000567299	0.723422	0.708456	0.780631

## Sheet: Fig1D
	ug of lecithin		1000						100						50						10						5						1						0.1
			Absorbance at 410 nm						Absorbance at 410 nm						Absorbance at 410 nm						Absorbance at 410 nm						Absorbance at 410 nm						Absorbance at 410 nm						Absorbance at 410 nm
	t(s)	Control	1	2	3		t(s)	Control	1	2	3		t(s)	Control	1	2	3		t(s)	Control	1	2	3		t(s)	Control	1	2	3		t(s)	Control	1	2	3		t(s)	Control	1	2	3
	0.05	0.00097124	-0.00386528	0.00501547	0.0145808		0.05	0.00097124	0.0134354	0.0186564	0.0221019		0.05	0.00097124	0.103912	0.0366584	0.0326946		0.05	0.00097124	0.0149052	0.0283518	0.0585095		0.05	0.00097124	0.0301259	0.0103073	0.00142015		0.05	0.00097124	0.0164467	0.00319072	0.0145407		0.05	0.00097124	0.032615	0.0410503	0.025256
	5.05	0.00100188	0.0153504	0.0253408	0.0347366		5.05	0.00100188	0.0257159	0.0346408	0.0413754		5.05	0.00100188	0.118625	0.0623543	0.0518183		5.05	0.00100188	0.0442368	0.0518897	0.0945035		5.05	0.00100188	0.0567123	0.0354816	0.0225598		5.05	0.00100188	0.0438828	0.0190543	0.0394847		5.05	0.00100188	0.0334271	0.0422276	0.0260761
	10.05	0.00258212	0.0315869	0.041484	0.0479971		10.05	0.00258212	0.0418947	0.048044	0.0560417		10.05	0.00258212	0.133068	0.0700073	0.0639799		10.05	0.00258212	0.0634863	0.0765816	0.116364		10.05	0.00258212	0.0864562	0.0655682	0.0759031		10.05	0.00258212	0.0712832	0.0380724	0.0685527		10.05	0.00258212	0.0341812	0.0438408	0.0274364
	15.05	0.000942988	0.0424953	0.0554482	0.0621394		15.05	0.000942988	0.0555707	0.0628649	0.0814966		15.05	0.000942988	0.145621	0.085955	0.0785862		15.05	0.000942988	0.0948534	0.104049	0.144663		15.05	0.000942988	0.112808	0.0934214	0.0910518		15.05	0.000942988	0.101518	0.0609655	0.0892944		15.05	0.000942988	0.0350658	0.0438898	0.0289517
	20.05	-0.000133603	0.0557428	0.072343	0.0712407		20.05	-0.000133603	0.0650614	0.0761746	0.0736128		20.05	-0.000133603	0.156219	0.109919	0.0980639		20.05	-0.000133603	0.118411	0.122896	0.176203		20.05	-0.000133603	0.141987	0.122914	0.124066		20.05	-0.000133603	0.127246	0.081958	0.111045		20.05	-0.000133603	0.0361395	0.0445091	0.030454
	25.05	0.000796931	0.0698784	0.0824061	0.0819819		25.05	0.000796931	0.0753713	0.0983773	0.0894698		25.05	0.000796931	0.169099	0.127284	0.101892		25.05	0.000796931	0.143272	0.148265	0.206379		25.05	0.000796931	0.171929	0.18678	0.165222		25.05	0.000796931	0.153388	0.104294	0.132006		25.05	0.000796931	0.0368999	0.0453999	0.0314808
	30.05	0.00138072	0.0820842	0.0953426	0.091679		30.05	0.00138072	0.0868664	0.102501	0.0975457		30.05	0.00138072	0.181415	0.127749	0.117585		30.05	0.00138072	0.173872	0.175907	0.237743		30.05	0.00138072	0.203416	0.181601	0.202137		30.05	0.00138072	0.179795	0.127731	0.153355		30.05	0.00138072	0.0375648	0.0459397	0.0322637
	35.05	0.00114017	0.0915583	0.105989	0.102043		35.05	0.00114017	0.0977756	0.116729	0.10265		35.05	0.00114017	0.191611	0.129057	0.13153		35.05	0.00114017	0.210777	0.205141	0.269599		35.05	0.00114017	0.233828	0.207587	0.233703		35.05	0.00114017	0.204158	0.154009	0.173678		35.05	0.00114017	0.0384033	0.0472387	0.0335303
	40.05	0.00222856	0.102435	0.115127	0.111469		40.05	0.00222856	0.10796	0.128572	0.113733		40.05	0.00222856	0.201294	0.138618	0.140367		40.05	0.00222856	0.241048	0.23506	0.303062		40.05	0.00222856	0.264356	0.241009	0.271592		40.05	0.00222856	0.226514	0.171779	0.193332		40.05	0.00222856	0.039333	0.0478728	0.0344884
	45.05	0.00116005	0.112938	0.124962	0.120819		45.05	0.00116005	0.118558	0.139359	0.125982		45.05	0.00116005	0.214151	0.161866	0.152969		45.05	0.00116005	0.285239	0.265368	0.335838		45.05	0.00116005	0.295483	0.268262	0.297329		45.05	0.00116005	0.247441	0.191987	0.21008		45.05	0.00116005	0.0400895	0.0486942	0.0345208
	50.05	0.00186915	0.122356	0.132162	0.129123		50.05	0.00186915	0.128291	0.153026	0.132865		50.05	0.00186915	0.224698	0.161068	0.161242		50.05	0.00186915	0.309859	0.296428	0.367843		50.05	0.00186915	0.32642	0.297665	0.327661		50.05	0.00186915	0.266412	0.211921	0.225396		50.05	0.00186915	0.0404371	0.0496725	0.0350682
	55.05	0.0021662	0.130289	0.144007	0.139198		55.05	0.0021662	0.138333	0.16307	0.141091		55.05	0.0021662	0.233404	0.171754	0.170743		55.05	0.0021662	0.344639	0.328568	0.399986		55.05	0.0021662	0.353487	0.326645	0.357888		55.05	0.0021662	0.282882	0.231586	0.24104		55.05	0.0021662	0.041168	0.050307	0.0368406
	60.05	0.000826445	0.140316	0.150616	0.145802		60.05	0.000826445	0.146122	0.172427	0.150265		60.05	0.000826445	0.242459	0.180703	0.180481		60.05	0.000826445	0.378432	0.359204	0.430644		60.05	0.000826445	0.380597	0.353884	0.384243		60.05	0.000826445	0.297641	0.247862	0.255722		60.05	0.000826445	0.0424887	0.0506799	0.0371921
	65.05	0.00130563	0.146053	0.158735	0.158042		65.05	0.00130563	0.15402	0.182634	0.158842		65.05	0.00130563	0.251572	0.190439	0.191246		65.05	0.00130563	0.414423	0.391894	0.459526		65.05	0.00130563	0.407262	0.379561	0.409871		65.05	0.00130563	0.311319	0.263984	0.267265		65.05	0.00130563	0.0424386	0.0513932	0.0371804
	70.05	0.000733995	0.15512	0.165643	0.163448		70.05	0.000733995	0.164291	0.192481	0.168642		70.05	0.000733995	0.273705	0.198613	0.199696		70.05	0.000733995	0.447719	0.422968	0.489402		70.05	0.000733995	0.432586	0.404249	0.439902		70.05	0.000733995	0.324293	0.279046	0.279188		70.05	0.000733995	0.04265	0.0526393	0.0386225
	75.05	0.000473117	0.163403	0.175737	0.17148		75.05	0.000473117	0.171762	0.201195	0.177057		75.05	0.000473117	0.269438	0.208158	0.209229		75.05	0.000473117	0.480774	0.454827	0.518715		75.05	0.000473117	0.456142	0.427509	0.455095		75.05	0.000473117	0.335228	0.292092	0.289079		75.05	0.000473117	0.04297	0.0530167	0.039166
	80.05	0.00242227	0.171065	0.18435	0.178182		80.05	0.00242227	0.181835	0.211198	0.186852		80.05	0.00242227	0.277947	0.218895	0.218827		80.05	0.00242227	0.512318	0.484056	0.54407		80.05	0.00242227	0.480653	0.450035	0.478534		80.05	0.00242227	0.34431	0.304307	0.299492		80.05	0.00242227	0.0438422	0.0540402	0.0396486
	85.05	0.00149975	0.17921	0.191083	0.187033		85.05	0.00149975	0.189173	0.220233	0.195934		85.05	0.00149975	0.286646	0.227157	0.226326		85.05	0.00149975	0.543615	0.510882	0.569169		85.05	0.00149975	0.500919	0.471764	0.499802		85.05	0.00149975	0.352389	0.312881	0.306687		85.05	0.00149975	0.0443362	0.0548672	0.0405101
	90.05	0.00334385	0.187546	0.200067	0.195197		90.05	0.00334385	0.198804	0.230277	0.203775		90.05	0.00334385	0.29593	0.236162	0.235609		90.05	0.00334385	0.57005	0.539094	0.59179		90.05	0.00334385	0.51934	0.493858	0.516839		90.05	0.00334385	0.360156	0.322733	0.314631		90.05	0.00334385	0.0448913	0.0553275	0.0409789
	95.05	0.000914763	0.195947	0.206166	0.201439		95.05	0.000914763	0.207051	0.239861	0.211869		95.05	0.000914763	0.304993	0.244381	0.243353		95.05	0.000914763	0.597548	0.566108	0.614351		95.05	0.000914763	0.538552	0.509981	0.53241		95.05	0.000914763	0.367368	0.332274	0.321652		95.05	0.000914763	0.0446984	0.0555922	0.0410511
	100.05	0.000849087	0.201185	0.212936	0.208088		100.05	0.000849087	0.215265	0.24903	0.221162		100.05	0.000849087	0.311521	0.255176	0.252586		100.05	0.000849087	0.62208	0.591237	0.632777		100.05	0.000849087	0.554818	0.525747	0.546873		100.05	0.000849087	0.373995	0.340431	0.327507		100.05	0.000849087	0.0449518	0.0567441	0.041438
	105.05	-0.000408754	0.209058	0.220983	0.21641		105.05	-0.000408754	0.224192	0.257996	0.231084		105.05	-0.000408754	0.320062	0.262967	0.265326		105.05	-0.000408754	0.646663	0.615129	0.652417		105.05	-0.000408754	0.570803	0.538695	0.561419		105.05	-0.000408754	0.379463	0.347576	0.332648		105.05	-0.000408754	0.0455322	0.0556328	0.0417356
	110.05	-0.000182509	0.215673	0.227352	0.224842		110.05	-0.000182509	0.231853	0.267865	0.239667		110.05	-0.000182509	0.328598	0.270281	0.271862		110.05	-0.000182509	0.669589	0.63663	0.667869		110.05	-0.000182509	0.585694	0.554463	0.57682		110.05	-0.000182509	0.385231	0.353372	0.338575		110.05	-0.000182509	0.0452946	0.0560909	0.0421017
	115.05	-0.00027446	0.221568	0.235382	0.229717		115.05	-0.00027446	0.24067	0.277844	0.248555		115.05	-0.00027446	0.337238	0.278552	0.278973		115.05	-0.00027446	0.689901	0.657994	0.682848		115.05	-0.00027446	0.598511	0.566483	0.590939		115.05	-0.00027446	0.388879	0.357535	0.342918		115.05	-0.00027446	0.0455904	0.0564397	0.0426944
	120.05	0.000281161	0.229126	0.240762	0.236042		120.05	0.000281161	0.249254	0.287358	0.257382		120.05	0.000281161	0.345248	0.286975	0.285396		120.05	0.000281161	0.709312	0.677059	0.695663		120.05	0.000281161	0.610899	0.578316	0.587315		120.05	0.000281161	0.393009	0.363259	0.347137		120.05	0.000281161	0.0458116	0.0565971	0.0434384
	125.05	0.000236507	0.23396	0.245934	0.242357		125.05	0.000236507	0.256609	0.295492	0.26612		125.05	0.000236507	0.352902	0.296571	0.295925		125.05	0.000236507	0.726478	0.696188	0.709539		125.05	0.000236507	0.622524	0.5885	0.591819		125.05	0.000236507	0.396342	0.368423	0.351776		125.05	0.000236507	0.0460375	0.0569606	0.0432149
	130.05	-0.000936218	0.239613	0.254261	0.247802		130.05	-0.000936218	0.264455	0.305296	0.274319		130.05	-0.000936218	0.361595	0.3053	0.303752		130.05	-0.000936218	0.74428	0.714326	0.720947		130.05	-0.000936218	0.631942	0.597655	0.600851		130.05	-0.000936218	0.400981	0.371874	0.355881		130.05	-0.000936218	0.0457864	0.0572643	0.0432509
	135.05	-0.00012646	0.247181	0.258937	0.254904		135.05	-0.00012646	0.272653	0.312935	0.28253		135.05	-0.00012646	0.369874	0.312326	0.311082		135.05	-0.00012646	0.757913	0.73194	0.730794		135.05	-0.00012646	0.641509	0.606238	0.608366		135.05	-0.00012646	0.403053	0.375924	0.358828		135.05	-0.00012646	0.0461775	0.057382	0.0439131
	140.05	0.00052811	0.251698	0.263565	0.261935		140.05	0.00052811	0.280306	0.32201	0.292528		140.05	0.00052811	0.377398	0.320866	0.32323		140.05	0.00052811	0.772772	0.7489	0.740848		140.05	0.00052811	0.651367	0.614494	0.618122		140.05	0.00052811	0.407528	0.379493	0.36209		140.05	0.00052811	0.046397	0.0576353	0.0439907
	145.05	0.000365586	0.257127	0.268969	0.267248		145.05	0.000365586	0.288549	0.332116	0.302433		145.05	0.000365586	0.384998	0.32913	0.328104		145.05	0.000365586	0.774084	0.762938	0.748833		145.05	0.000365586	0.658666	0.622501	0.626825		145.05	0.000365586	0.410881	0.382991	0.364922		145.05	0.000365586	0.0466563	0.0578675	0.0445469
	150.05	0.000912481	0.262728	0.275268	0.274325		150.05	0.000912481	0.296528	0.340003	0.310534		150.05	0.000912481	0.393108	0.338592	0.334604		150.05	0.000912481	0.785414	0.77451	0.756582		150.05	0.000912481	0.665966	0.629711	0.633039		150.05	0.000912481	0.414106	0.38685	0.367902		150.05	0.000912481	0.0465561	0.0584335	0.0448828
	155.05	0.00150048	0.268977	0.280849	0.279879		155.05	0.00150048	0.304567	0.348908	0.320005		155.05	0.00150048	0.401785	0.346678	0.34421		155.05	0.00150048	0.798442	0.787016	0.765171		155.05	0.00150048	0.673062	0.635885	0.641962		155.05	0.00150048	0.416661	0.389296	0.371687		155.05	0.00150048	0.0466147	0.0585858	0.0450125
	160.05	0.00112631	0.27556	0.286	0.286818		160.05	0.00112631	0.312407	0.357728	0.328133		160.05	0.00112631	0.408607	0.35445	0.351871		160.05	0.00112631	0.808863	0.798174	0.770005		160.05	0.00112631	0.678546	0.641036	0.649986		160.05	0.00112631	0.419938	0.392606	0.374638		160.05	0.00112631	0.0468747	0.0586869	0.0455126
	165.05	0.000850098	0.279897	0.291261	0.292564		165.05	0.000850098	0.320769	0.367539	0.337848		165.05	0.000850098	0.417118	0.362828	0.361216		165.05	0.000850098	0.818485	0.810397	0.776743		165.05	0.000850098	0.685434	0.646728	0.655401		165.05	0.000850098	0.422597	0.395576	0.3761		165.05	0.000850098	0.0472285	0.0588656	0.0456464
	170.05	0.00109947	0.284312	0.296916	0.298396		170.05	0.00109947	0.329738	0.375932	0.346718		170.05	0.00109947	0.42288	0.371289	0.36712		170.05	0.00109947	0.82686	0.81994	0.782572		170.05	0.00109947	0.691262	0.651115	0.660422		170.05	0.00109947	0.425903	0.400102	0.378614		170.05	0.00109947	0.046982	0.0593307	0.0462675
	175.05	0.00145032	0.289435	0.30222	0.304324		175.05	0.00145032	0.337104	0.384945	0.355857		175.05	0.00145032	0.429551	0.379581	0.37575		175.05	0.00145032	0.836785	0.82868	0.787452		175.05	0.00145032	0.697007	0.656952	0.666844		175.05	0.00145032	0.428105	0.402965	0.381672		175.05	0.00145032	0.0474802	0.059321	0.0462302
	180.05	0.000567299	0.295259	0.306764	0.308463		180.05	0.000567299	0.34492	0.393851	0.364024		180.05	0.000567299	0.438242	0.421511	0.383493		180.05	0.000567299	0.843563	0.836653	0.791383		180.05	0.000567299	0.702154	0.662386	0.672663		180.05	0.000567299	0.429703	0.404957	0.384976		180.05	0.000567299	0.0478473	0.0597735	0.0464613
							VpTLH activity was assayed by triplicate as variying lecithin concentration .
						Lecithin (ug)	% HmActivity	SD
						1	0	0
						2	15.0206	4.60085
						3	60.0095	3.92021
						4	90.9422	4.53328
						5	100	4.53328
						6	34.8661	2.12967
						7	34.3799	3.66651

## Sheet: Fig3
		Absorbance (410 nm)					Absorbance (410 nm)					Absorbance (410 nm)					Absorbance (410 nm)					Absorbance (410 nm)					Absorbance (410 nm)					Absorbance (410 nm)					Absorbance (410 nm)					Absorbance (410 nm)					Absorbance (410 nm)
PNPL	20 uM					40 uM					60 uM					80 uM					100 Um					120 uM					140 uM					160 uM					200 uM					300 uM
	t(s)	1	2	3		t(s)	1	2	3		t(s)	1	2	3		t(s)	1	2	3		t(s)	1	2	3		t(s)	1	2	3		t(s)	1	2	3		t(s)	1	2	3		t(s)	1	2	3		t(s)	1	2	3
	0.05	0.0533074	0.0510237	0.0407288		0.05	0.0297999	0.0296211	0.0375838		0.05	0.0432115	0.047685	0.0578329		0.05	0.0457162	0.0740327	0.0450316		0.05	0.054122	0.0532241	0.0544019		0.05	0.0612894	0.0684139	0.0829959		0.05	0.0803634	0.0749512	0.0677325		0.05	0.106096	0.0834158	0.0760117		0.05	0.0535794	0.0840332	0.0641961		0.05	0.0701421	0.0739687	0.0516502
	5.05	0.0974155	0.0612797	0.0797575		5.05	0.0631227	0.0587157	0.0829311		5.05	0.106282	0.114204	0.105925		5.05	0.115347	0.126455	0.105254		5.05	0.139974	0.108046	0.127228		5.05	0.12994	0.152231	0.164967		5.05	0.189614	0.170244	0.144567		5.05	0.238303	0.155668	0.176255		5.05	0.116245	0.1786	0.133678		5.05	0.142026	0.164557	0.125462
	10.05	0.129342	0.0834149	0.108038		10.05	0.0943643	0.088046	0.121759		10.05	0.168887	0.167221	0.155848		10.05	0.176653	0.183002	0.198026		10.05	0.209416	0.167815	0.187571		10.05	0.205387	0.221177	0.240522		10.05	0.274628	0.25327	0.2091		10.05	0.325078	0.236526	0.280094		10.05	0.192136	0.269237	0.210069		10.05	0.21743	0.259872	0.208121
	15.05	0.156347	0.0942548	0.125298		15.05	0.122597	0.117833	0.154669		15.05	0.207895	0.216038	0.202424		15.05	0.231976	0.233879	0.204403		15.05	0.269701	0.221017	0.2467		15.05	0.267927	0.287058	0.303289		15.05	0.351897	0.318404	0.271869		15.05	0.416405	0.315557	0.370014		15.05	0.266372	0.360096	0.294602		15.05	0.302202	0.374421	0.303383
	20.05	0.176915	0.108203	0.141271		20.05	0.152929	0.146493	0.18468		20.05	0.245542	0.259656	0.246612		20.05	0.285855	0.285905	0.244333		20.05	0.338958	0.273575	0.302912		20.05	0.330217	0.356386	0.367442		20.05	0.432636	0.398112	0.334281		20.05	0.509305	0.387213	0.461193		20.05	0.353901	0.453887	0.38018		20.05	0.397519	0.469739	0.396187
	25.05	0.188095	0.117126	0.152093		25.05	0.179691	0.175822	0.213703		25.05	0.291635	0.304675	0.303736		25.05	0.340539	0.32785	0.290518		25.05	0.392654	0.317207	0.360988		25.05	0.391044	0.424052	0.421281		25.05	0.510136	0.463725	0.399798		25.05	0.590481	0.453898	0.549067		25.05	0.440326	0.573539	0.47068		25.05	0.499301	0.579619	0.506689
	30.05	0.200883	0.12911	0.16218		30.05	0.212366	0.193063	0.244925		30.05	0.331093	0.358548	0.347229		30.05	0.396436	0.377571	0.330621		30.05	0.453366	0.369903	0.420577		30.05	0.454692	0.483821	0.479789		30.05	0.577112	0.534699	0.463233		30.05	0.674726	0.524331	0.638275		30.05	0.529308	0.652336	0.566649		30.05	0.597123	0.684502	0.614804
	35.05	0.213427	0.129352	0.170602		35.05	0.23178	0.225371	0.272731		35.05	0.37075	0.383625	0.394627		35.05	0.451088	0.424422	0.377781		35.05	0.517917	0.420828	0.470654		35.05	0.515287	0.536956	0.536421		35.05	0.645035	0.61347	0.524466		35.05	0.74901	0.604693	0.734471		35.05	0.619651	0.766748	0.658249		35.05	0.705913	0.789248	0.720981
	40.05	0.218037	0.140193	0.178528		40.05	0.259663	0.248846	0.301239		40.05	0.428038	0.425378	0.436743		40.05	0.493747	0.472157	0.424665		40.05	0.575802	0.473805	0.532838		40.05	0.582969	0.593491	0.60854		40.05	0.710508	0.68211	0.585213		40.05	0.829711	0.682466	0.827227		40.05	0.712171	0.848238	0.758898		40.05	0.810426	0.904373	0.824427
	45.05	0.225769	0.139327	0.183898		45.05	0.28204	0.271035	0.320059		45.05	0.45925	0.45606	0.469773		45.05	0.549108	0.519884	0.459804		45.05	0.615753	0.52255	0.587674		45.05	0.641167	0.652859	0.649809		45.05	0.765638	0.749013	0.644927		45.05	0.899077	0.730898	0.905177		45.05	0.803185	0.938758	0.856383		45.05	0.92004	1.01879	0.934461
	50.05	0.229974	0.150971	0.194032		50.05	0.29877	0.29798	0.346354		50.05	0.489314	0.484035	0.48346		50.05	0.583605	0.56141	0.508512		50.05	0.676567	0.57453	0.636578		50.05	0.689481	0.707589	0.696476		50.05	0.825223	0.808047	0.706157		50.05	0.965016	0.792824	1.00123		50.05	0.892311	1.02983	0.943614		50.05	1.00955	1.12004	1.03964
	55.05	0.239647	0.153876	0.198941		55.05	0.321741	0.319411	0.364135		55.05	0.519527	0.511598	0.511081		55.05	0.637707	0.595749	0.536798		55.05	0.714225	0.617915	0.674674		55.05	0.746388	0.760801	0.736697		55.05	0.87832	0.865187	0.766026		55.05	1.03164	0.859287	1.05961		55.05	0.978511	1.1202	1.03272		55.05	1.10983	1.21776	1.13377
	60.05	0.243527	0.149136	0.194614		60.05	0.334562	0.333281	0.380288		60.05	0.552211	0.535948	0.551725		60.05	0.66138	0.635109	0.569721		60.05	0.747049	0.656186	0.721191		60.05	0.794634	0.808397	0.775077		60.05	0.928435	0.919524	0.816159		60.05	1.0859	0.916569	1.13294		60.05	1.05536	1.20633	1.12387		60.05	1.21261	1.31794	1.25143
	65.05	0.241904	0.148855	0.20402		65.05	0.348727	0.35491	0.393922		65.05	0.578072	0.558276	0.56689		65.05	0.692801	0.670627	0.622148		65.05	0.7945	0.696824	0.764894		65.05	0.8408	0.852255	0.804058		65.05	0.974526	0.968734	0.866187		65.05	1.14132	0.970071	1.20096		65.05	1.12947	1.28745	1.20611		65.05	1.30985	1.42374	1.34296
	70.05	0.24796	0.149664	0.206855		70.05	0.358569	0.36634	0.408089		70.05	0.605565	0.576596	0.59983		70.05	0.723744	0.702359	0.636301		70.05	0.817581	0.734441	0.802238		70.05	0.878521	0.889938	0.839738		70.05	1.01662	1.01493	0.911795		70.05	1.18103	1.02259	1.26688		70.05	1.21807	1.36606	1.29112		70.05	1.37959	1.4971	1.4646
	75.05	0.246475	0.150443	0.20512		75.05	0.368536	0.376809	0.41947		75.05	0.629476	0.594067	0.622624		75.05	0.754454	0.730425	0.668706		75.05	0.844733	0.766813	0.838225		75.05	0.919004	0.924103	0.866771		75.05	1.05559	1.05025	0.953213		75.05	1.22034	1.07429	1.32111		75.05	1.28003	1.43622	1.3703		75.05	1.4882	1.5944	1.55478
	80.05	0.248156	0.151391	0.206351		80.05	0.375526	0.387855	0.42923		80.05	0.650224	0.611615	0.636625		80.05	0.770983	0.758253	0.696645		80.05	0.869003	0.795293	0.869964		80.05	0.95198	0.957174	0.891946		80.05	1.10109	1.08655	0.99679		80.05	1.26259	1.12038	1.38403		80.05	1.34719	1.51465	1.44236		80.05	1.57723	1.66394	1.62822
	85.05	0.25014	0.152004	0.207823		85.05	0.38334	0.395765	0.438966		85.05	0.669349	0.632295	0.653683		85.05	0.791519	0.778051	0.722621		85.05	0.891358	0.824607	0.898244		85.05	0.98473	0.988655	0.919881		85.05	1.11853	1.11861	1.03261		85.05	1.29372	1.16131	1.42317		85.05	1.40982	1.57238	1.51418		85.05	1.62473	1.76616	1.77065
	90.05	0.252633	0.153888	0.212423		90.05	0.389222	0.40424	0.445382		90.05	0.685922	0.639642	0.668916		90.05	0.808873	0.798704	0.751137		90.05	0.908874	0.850502	0.923916		90.05	1.01333	1.01129	0.934628		90.05	1.146	1.14732	1.06406		90.05	1.32566	1.19978	1.47137		90.05	1.47196	1.62332	1.5804		90.05	1.70181	1.81088	1.80122
	95.05	0.252378	0.153138	0.209476		95.05	0.393674	0.411977	0.451932		95.05	0.701192	0.652323	0.684931		95.05	0.824091	0.816617	0.767976		95.05	0.925361	0.87278	0.945517		95.05	1.03986	1.03437	0.953887		95.05	1.16912	1.16991	1.08846		95.05	1.3484	1.23311	1.50363		95.05	1.52805	1.70027	1.65251		95.05	1.77259	1.87646	1.89808
	100.05	0.253762	0.154847	0.211431		100.05	0.39713	0.419045	0.458533		100.05	0.713653	0.66106	0.698291		100.05	0.837439	0.831697	0.787542		100.05	0.939897	0.89029	0.964545		100.05	1.06433	1.05622	0.970474		100.05	1.19046	1.19353	1.11562		100.05	1.36565	1.26615	1.5446		100.05	1.57814	1.7262	1.7259		100.05	1.87706	1.92423	1.94123
	105.05	0.254212	0.154636	0.212927		105.05	0.401321	0.42399	0.463054		105.05	0.725348	0.670345	0.709915		105.05	0.848363	0.844669	0.805995		105.05	0.953114	0.907805	0.984818		105.05	1.08439	1.07597	0.983349		105.05	1.20559	1.20907	1.13919		105.05	1.39286	1.29791	1.57541		105.05	1.63306	1.78542	1.77578		105.05	2.00056	2.03979	2.07007
	110.05	0.255516	0.15492	0.214179		110.05	0.404116	0.42983	0.466955		110.05	0.736394	0.678341	0.726324		110.05	0.855366	0.855926	0.826968		110.05	0.965226	0.923151	0.998895		110.05	1.10139	1.08849	0.993083		110.05	1.22234	1.23141	1.15501		110.05	1.40936	1.31809	1.60232		110.05	1.6725	1.80918	1.83687		110.05	1.96669	2.00678	2.10308
	115.05	0.256464	0.155856	0.215556		115.05	0.406446	0.43416	0.470901		115.05	0.746239	0.686181	0.731374		115.05	0.863723	0.867373	0.834555		115.05	0.973612	0.937309	1.01153		115.05	1.12066	1.10175	1.007		115.05	1.23428	1.24566	1.17236		115.05	1.42524	1.34831	1.61795		115.05	1.71667	1.87551	1.85912		115.05	2.03468	2.12662	2.20484
	120.05	0.257074	0.155108	0.216798		120.05	0.409143	0.437246	0.473677		120.05	0.755873	0.689101	0.746966		120.05	0.870743	0.87754	0.847091		120.05	0.981251	0.946917	1.02326		120.05	1.13753	1.11334	1.01615		120.05	1.24775	1.26181	1.18499		120.05	1.43144	1.369	1.65389		120.05	1.77252	1.8867	1.9423		120.05	2.09496	2.17673	2.25008
				Absorbance at 410 nm						Michaelis-Menten calculations
		substrate [mM]	Std Dv.	Int Vel (abs*seg)	Int vel (min)	SA: U/mg (seg)	Resultados	Valor	desvest	desvest
		20	0.0208752	0.00286611	0.171967	0.0749311	Km:	150.8 uM	17.1	17.1
		40	0.0120567	0.00564066	0.33844	0.147468	Vmax:	46.42 uM/mg (min)	2.455	2.455
		60	0.00438009	0.00872053	0.523232	0.227988	Vmax (s)	0.7736 uM/mg (seg)	118.6	118.6
		80	0.0307111	0.00992498	0.595499	0.259476	Kcat	2242.08 min-1	1.976	1.976
		100	0.0302749	0.0115062	0.690371	0.300815	Kcat (s)	37.3680 s-1	20601.3	20601.3
		120	0.00825908	0.012539	0.752339	0.327816	Kcat/Km	2.47798*105 M s-1
		140	0.0354389	0.0141092	0.846552	0.368868	R2	0.9851
		160	0.0631147	0.0166236	0.997417	0.434604	Et (enzima)	0.021 uM (1 mg)
		200	0.0325441	0.0177596	1.06558	0.464305
		300	0.0293973	0.0198231	1.18939	0.518252
		400	0.0595644	0.0205855	1.23513	0.538183
							Absorbance (410 nm)				Absorbance (410 nm)

## Sheet: FIG2A
pH 6.0		Absorbance (410 nm)				pH 7.0		Absorbance (410 nm)				ph 7.5		Absorbance (410 nm)				pH 8.0		Absorbance (410 nm)				pH 8.5		Absorbance (410 nm)				pH 9.0		Absorbance (410 nm)				pH=10		Absorbance (410 nm)				pH=11		Absorbance (410 nm)
t(s)	Control	1	2	3		t(s)	Control	1	2	3		t(s)	Control	1	2	3		t(s)	Control	1	2	3		t(s)	Control	1	2	3		t(s)	Control	1	2	3		t(s)	control	M1-70	M2-70	M3-70		t(s)	control	M1-11	M2-11	M3-11
0.05	0.0028246	-0.00108394	-0.000316367	0.00232981		0.05	-0.00253799	0.00792352	0.016827	0.00930622		0.05	0.00097124	0.0514007	0.033859	0.0296		0.05	0.00097124	0.0149052	0.0283518	0.0585095		0.05	0.00097124	0.025	0.0184	0.0269		0.05	-0.00137222	0.0186474	0.0226061	0.0246404		0.05	1.1131e-06	0.0160561	0.018294	0.012682		0.05	0.00341301	0.0056335	0.00685494	0.019803
5.05	-0.00177834	-0.000853036	-0.00384876	0.00205409		5.05	0.000243085	0.0136197	0.0215072	0.0148315		5.05	0.00100188	0.0893477	0.0574608	0.0579		5.05	0.00100188	0.0442368	0.0518897	0.0945035		5.05	0.00100188	0.042	0.0327	0.0175		5.05	0.000589953	0.0371749	0.040383	0.0411297		5.05	-0.0003532	0.0290268	0.0316199	0.0234524		5.05	0.00338645	0.0118295	0.0116274	0.0247254
10.05	-0.00236187	-0.0025244	-0.000565602	0.00377654		10.05	-0.00293752	0.0207602	0.0280588	0.0201874		10.05	0.00258212	0.101094	0.0801115	0.0863		10.05	0.00258212	0.0634863	0.0765816	0.116364		10.05	0.00258212	0.0586	0.0565	0.0342		10.05	-0.00198516	0.0562994	0.0599358	0.0581783		10.05	0.000773877	0.0435745	0.0446612	0.0376684		10.05	0.00469302	0.0174011	0.0175872	0.0282854
15.05	-0.00116388	-0.00269247	-0.0052359	0.00464974		15.05	-0.00361624	0.0334659	0.0314888	0.0267063		15.05	0.000942988	0.130608	0.104212	0.1154		15.05	0.000942988	0.0948534	0.104049	0.144663		15.05	0.000942988	0.0782	0.0698	0.0535		15.05	-0.00107465	0.0759627	0.0798068	0.078587		15.05	-0.00187125	0.0566426	0.0592226	0.0492664		15.05	0.00491241	0.0205501	0.0226748	0.0337736
20.05	3.65266e-05	-0.00314245	-0.00585342	0.000876503		20.05	-0.00380801	0.0353925	0.0369039	0.0307142		20.05	-0.000133603	0.160437	0.12854	0.1449		20.05	-0.000133603	0.118411	0.122896	0.176203		20.05	-0.000133603	0.0913	0.0812	0.0695		20.05	-0.00108048	0.0979882	0.101371	0.0942783		20.05	-0.00176035	0.0719877	0.0764352	0.0629302		20.05	0.00641425	0.0259732	0.0302974	0.0363809
25.05	-0.000452406	-0.00307943	-0.00544368	0.00462609		25.05	-0.00385276	0.0409808	0.0414457	0.0370791		25.05	0.000796931	0.192492	0.154476	0.1767		25.05	0.000796931	0.143272	0.148265	0.206379		25.05	0.000796931	0.1075	0.0962	0.0858		25.05	-0.00295552	0.12003	0.125476	0.113912		25.05	-0.000977079	0.0938085	0.0891992	0.0791112		25.05	0.00706151	0.0299581	0.0376915	0.041454
30.05	-0.0029276	0.00334857	-0.00587339	0.0066623		30.05	-0.00315057	0.0494325	0.0463888	0.0464899		30.05	0.00138072	0.223571	0.184244	0.2069		30.05	0.00138072	0.173872	0.175907	0.237743		30.05	0.00138072	0.1217	0.1105	0.1037		30.05	-0.00320073	0.145357	0.147663	0.137781		30.05	-0.00262605	0.107944	0.102443	0.0944357		30.05	0.00752189	0.0357215	0.0394133	0.0462047
35.05	-0.00247447	-0.000991078	-0.00768629	0.00113134		35.05	-0.00384368	0.0540719	0.0525031	0.0442388		35.05	0.00114017	0.265939	0.214994	0.2409		35.05	0.00114017	0.210777	0.205141	0.269599		35.05	0.00114017	0.1377	0.1267	0.1215		35.05	-0.00177319	0.171735	0.172843	0.160549		35.05	-0.00237959	0.122484	0.11458	0.112398		35.05	0.00812079	0.0397109	0.0462668	0.0508033
40.05	-0.00248528	-0.00160326	-0.00650725	0.00198637		40.05	-0.00516336	0.06063	0.0577298	0.0495647		40.05	0.00222856	0.293426	0.24767	0.2738		40.05	0.00222856	0.241048	0.23506	0.303062		40.05	0.00222856	0.1524	0.1407	0.1401		40.05	-0.00411941	0.19966	0.201189	0.186385		40.05	-0.00314985	0.135868	0.12765	0.118467		40.05	0.00850933	0.043939	0.0513424	0.0545301
45.05	-0.00191135	-0.00295639	-0.00820535	0.000798954		45.05	-0.00509168	0.0667675	0.0633984	0.0594133		45.05	0.00116005	0.328036	0.280713	0.3063		45.05	0.00116005	0.285239	0.265368	0.335838		45.05	0.00116005	0.1662	0.1556	0.1584		45.05	-0.00253212	0.226808	0.227895	0.212853		45.05	-0.00252316	0.148417	0.136326	0.130977		45.05	0.0105765	0.0476352	0.0570376	0.0586035
50.05	-0.00165902	-0.0039267	-0.0102263	-0.000691743		50.05	-0.00539894	0.0741954	0.0697907	0.0598794		50.05	0.00186915	0.364131	0.315821	0.3415		50.05	0.00186915	0.309859	0.296428	0.367843		50.05	0.00186915	0.1813	0.1712	0.1744		50.05	-0.0043983	0.257074	0.254433	0.241091		50.05	-0.00227829	0.158742	0.145725	0.141197		50.05	0.0105983	0.0515052	0.0645049	0.0633858
55.05	-0.00160125	-0.00507141	-0.0118821	0.00224743		55.05	-0.00533031	0.0804587	0.0755701	0.0654924		55.05	0.0021662	0.399516	0.348072	0.3767		55.05	0.0021662	0.344639	0.328568	0.399986		55.05	0.0021662	0.1963	0.1839	0.1932		55.05	-0.00391777	0.286134	0.285015	0.270372		55.05	-0.00345443	0.169808	0.154531	0.148837		55.05	0.0121489	0.0565754	0.069584	0.0667797
60.05	-0.00128406	-0.00620771	-0.0137347	0.000540758		60.05	-0.00484339	0.0861498	0.0811268	0.0697144		60.05	0.000826445	0.432994	0.383351	0.4093		60.05	0.000826445	0.378432	0.359204	0.430644		60.05	0.000826445	0.222	0.1978	0.2101		60.05	-0.00291783	0.316092	0.314507	0.298935		60.05	-0.0030129	0.179394	0.16186	0.157346		60.05	0.0122164	0.0595722	0.0716684	0.071241
65.05	-0.00145473	-0.00779365	-0.0143869	-0.000321695		65.05	-0.00509992	0.0931221	0.0867885	0.0755716		65.05	0.00130563	0.468813	0.417015	0.4445		65.05	0.00130563	0.414423	0.391894	0.459526		65.05	0.00130563	0.2289	0.2111	0.2255		65.05	-0.00291207	0.344796	0.343349	0.330007		65.05	-0.0041031	0.19014	0.169255	0.165312		65.05	0.0141107	0.0621916	0.0770909	0.0749646
70.05	-0.00158856	-0.00810282	-0.0156377	-0.000888791		70.05	-0.00357044	0.0988469	0.0923746	0.0795604		70.05	0.000733995	0.500521	0.450758	0.4759		70.05	0.000733995	0.447719	0.422968	0.489402		70.05	0.000733995	0.2296	0.2241	0.2409		70.05	-0.00274058	0.373532	0.372866	0.360773		70.05	-0.00278235	0.19968	0.175689	0.171801		70.05	0.01454	0.0663589	0.0831979	0.0795784
75.05	-0.00130641	-0.00994329	-0.0156649	-0.00820002		75.05	-0.00270204	0.105283	0.097847	0.0868331		75.05	0.000473117	0.53107	0.482582	0.5075		75.05	0.000473117	0.480774	0.454827	0.518715		75.05	0.000473117	0.2395	0.2355	0.2556		75.05	-0.00345037	0.403053	0.402425	0.389521		75.05	-0.00253459	0.207114	0.18236	0.179243		75.05	0.0145813	0.0698959	0.0873147	0.082553
80.05	-0.00146314	-0.00915235	-0.0167882	-0.00271023		80.05	-0.00398924	0.111251	0.102566	0.0910336		80.05	0.00242227	0.56068	0.512961	0.5388		80.05	0.00242227	0.512318	0.484056	0.54407		80.05	0.00242227	0.2496	0.2468	0.2712		80.05	-0.00343203	0.43049	0.431026	0.419905		80.05	-0.00411705	0.215228	0.187659	0.184485		80.05	0.0157126	0.0747426	0.0929524	0.0876187
85.05	-0.00251163	-0.00952037	-0.0181447	-0.00382443		85.05	-0.00239719	0.117247	0.108597	0.0946035		85.05	0.00149975	0.587096	0.540818	0.5667		85.05	0.00149975	0.543615	0.510882	0.569169		85.05	0.00149975	0.2588	0.2567	0.2846		85.05	-0.00292657	0.457351	0.459529	0.449424		85.05	-0.00450848	0.223925	0.193996	0.189701		85.05	0.0168959	0.07921	0.0995358	0.0912934
90.05	-0.00202669	-0.0124886	-0.0188964	-0.00505269		90.05	-0.00277762	0.122873	0.114395	0.100816		90.05	0.00334385	0.613425	0.568679	0.5944		90.05	0.00334385	0.57005	0.539094	0.59179		90.05	0.00334385	0.2674	0.2665	0.2973		90.05	-0.00375458	0.484109	0.487367	0.478318		90.05	-0.00404853	0.233174	0.19894	0.19603		90.05	0.0165239	0.0823665	0.103258	0.0941848
95.05	-0.00204148	-0.0130099	-0.0201177	-0.00529625		95.05	-0.00382751	0.128545	0.116947	0.104378		95.05	0.000914763	0.635794	0.595418	0.6204		95.05	0.000914763	0.597548	0.566108	0.614351		95.05	0.000914763	0.274	0.276	0.3084		95.05	-0.00421356	0.50798	0.513862	0.502349		95.05	-0.00387498	0.23932	0.205307	0.20306		95.05	0.0173862	0.0873079	0.108206	0.097196
100.05	-0.00219048	-0.0135045	-0.0220127	-0.00650072		100.05	-0.00327457	0.13375	0.122332	0.109919		100.05	0.000849087	0.65692	0.619037	0.6443		100.05	0.000849087	0.62208	0.591237	0.632777		100.05	0.000849087	0.2814	0.2851	0.3193		100.05	-0.00342217	0.529223	0.538625	0.528539		100.05	-0.00390299	0.246451	0.210918	0.20934		100.05	0.0187175	0.0916207	0.113324	0.100404
105.05	-0.00199907	-0.013384	-0.0222132	-0.00709725		105.05	-0.00222519	0.138666	0.128638	0.113992		105.05	-0.000408754	0.6776	0.642888	0.6672		105.05	-0.000408754	0.646663	0.615129	0.652417		105.05	-0.000408754	0.2886	0.2922	0.3287		105.05	-0.00340347	0.552573	0.562831	0.55348		105.05	-0.00428159	0.25371	0.214722	0.214117		105.05	0.0189225	0.0954664	0.118891	0.104113
110.05	-0.00136912	-0.0138494	-0.0235693	-0.00944875		110.05	-0.00260824	0.14342	0.13276	0.117507		110.05	-0.000182509	0.694164	0.662855	0.6878		110.05	-0.000182509	0.669589	0.63663	0.667869		110.05	-0.000182509	0.2944	0.2991	0.3377		110.05	-0.00430456	0.573599	0.585116	0.575732		110.05	-0.00390525	0.260627	0.218424	0.22047		110.05	0.0202163	0.0986087	0.123719	0.107748
115.05	-0.00191681	-0.0153358	-0.0245462	-0.0088347		115.05	-0.00366989	0.146292	0.136084	0.123294		115.05	-0.00027446	0.70956	0.683867	0.7078		115.05	-0.00027446	0.689901	0.657994	0.682848		115.05	-0.00027446	0.2993	0.3057	0.346		115.05	-0.00372199	0.592023	0.610865	0.597954		115.05	-0.0039502	0.268201	0.22427	0.227286		115.05	0.0211	0.102156	0.127879	0.111973
120.05	-0.00202545	-0.0166434	-0.0263046	-0.0105707		120.05	-0.00435177	0.149992	0.139608	0.126127		120.05	0.000281161	0.722939	0.700748	0.7258		120.05	0.000281161	0.709312	0.677059	0.695663		120.05	0.000281161	0.3047	0.3116	0.3542		120.05	-0.00348416	0.609139	0.628789	0.618004		120.05	-0.0034948	0.274899	0.229449	0.229341		120.05	0.0215314	0.10626	0.133225	0.114307
125.05	-0.00101546	-0.018056	-0.0282612	-0.0120884		125.05	-0.00404633	0.155455	0.143665	0.130785		125.05	0.000236507	0.734754	0.717331	0.7412		125.05	0.000236507	0.726478	0.696188	0.709539		125.05	0.000236507	0.3083	0.3167	0.3611		125.05	-0.00421002	0.625413	0.649334	0.634625		125.05	-0.00223004	0.28116	0.234238	0.233211		125.05	0.0217438	0.11122	0.138577	0.117796
130.05	-0.0014956	-0.0184516	-0.02888	-0.0117247		130.05	-0.00432034	0.158702	0.148067	0.133167		130.05	-0.000936218	0.7483	0.732232	0.7576		130.05	-0.000936218	0.74428	0.714326	0.720947		130.05	-0.000936218	0.3128	0.3219	0.3689		130.05	-0.00573812	0.640032	0.66679	0.652259		130.05	-0.00374545	0.287652	0.238009	0.238252		130.05	0.0235719	0.114714	0.143712	0.121355
135.05	-0.00156504	-0.0194286	-0.0297681	-0.0125192		135.05	-0.00401678	0.161826	0.152166	0.136886		135.05	-0.00012646	0.759242	0.747698	0.7709		135.05	-0.00012646	0.757913	0.73194	0.730794		135.05	-0.00012646	0.3159	0.3265	0.3767		135.05	-0.0061925	0.653907	0.683232	0.669189		135.05	-0.00374175	0.29387	0.242763	0.242597		135.05	0.0241315	0.117721	0.148534	0.125836
140.05	-0.0014923	-0.0195393	-0.0306814	-0.01296		140.05	-0.00416721	0.165991	0.156043	0.138157		140.05	0.00052811	0.768348	0.760199	0.7826		140.05	0.00052811	0.772772	0.7489	0.740848		140.05	0.00052811	0.3186	0.3315	0.3816		140.05	-0.00566868	0.6676	0.698511	0.683354		140.05	-0.00389422	0.301222	0.247215	0.247666		140.05	0.0245932	0.122716	0.152828	0.128905
145.05	-0.00122609	-0.0196675	-0.0318246	-0.0138501		145.05	-0.00340039	0.16878	0.159031	0.141824		145.05	0.000365586	0.776699	0.770747	0.7962		145.05	0.000365586	0.774084	0.762938	0.748833		145.05	0.000365586	0.3212	0.3353	0.3853		145.05	-0.00415613	0.681064	0.713494	0.697307		145.05	-0.00368385	0.307175	0.250392	0.251703		145.05	0.02603	0.126513	0.157536	0.131349
150.05	-0.00187161	-0.021153	-0.033075	-0.0128524		150.05	-0.00391967	0.171965	0.160905	0.144063		150.05	0.000912481	0.787356	0.781417	0.8084		150.05	0.000912481	0.785414	0.77451	0.756582		150.05	0.000912481	0.3249	0.3382	0.3897		150.05	-0.00301953	0.694636	0.726409	0.709391		150.05	-0.00345551	0.313292	0.255588	0.255128		150.05	0.0266973	0.12977	0.163179	0.135136
155.05	-0.00195124	-0.0211677	-0.0329678	-0.0110719		155.05	-0.00366717	0.175178	0.163826	0.146091		155.05	0.00150048	0.793548	0.790902	0.8177		155.05	0.00150048	0.798442	0.787016	0.765171		155.05	0.00150048	0.3269	0.3423	0.3928		155.05	-0.00320587	0.705676	0.74054	0.721877		155.05	-0.00373416	0.319454	0.258509	0.259333		155.05	0.0279503	0.13399	0.167772	0.138707
160.05	-0.00124375	-0.0212412	-0.0340101	-0.0125255		160.05	-0.0045529	0.177542	0.165811	0.148445		160.05	0.00112631	0.799867	0.798582	0.828		160.05	0.00112631	0.808863	0.798174	0.770005		160.05	0.00112631	0.3299	0.3457	0.3972		160.05	-0.00396353	0.71536	0.752686	0.734794		160.05	-0.00408792	0.325347	0.263453	0.263216		160.05	0.0283557	0.137945	0.170803	0.141203
165.05	-0.000918446	-0.02185	-0.0352249	-0.013565		165.05	-0.00458492	0.180909	0.167591	0.151262		165.05	0.000850098	0.807732	0.805958	0.8354		165.05	0.000850098	0.818485	0.810397	0.776743		165.05	0.000850098	0.3326	0.349	0.4012		165.05	-0.00424822	0.7235	0.764824	0.745757		165.05	-0.00283688	0.332014	0.267046	0.26781		165.05	0.0286875	0.141725	0.177416	0.144277
170.05	-0.00128112	-0.0222657	-0.0357674	-0.0143383		170.05	-0.00504926	0.182805	0.17014	0.153734		170.05	0.00109947	0.811997	0.814567	0.8435		170.05	0.00109947	0.82686	0.81994	0.782572		170.05	0.00109947	0.3348	0.3521	0.4041		170.05	-0.00318793	0.732328	0.775488	0.755356		170.05	-0.00330581	0.338932	0.270856	0.272702		170.05	0.030237	0.146176	0.181326	0.147201
175.05	-0.00144111	-0.0232364	-0.0362755	-0.0161074		175.05	-0.00523421	0.185566	0.172421	0.155655		175.05	0.00145032	0.818179	0.822482	0.8507		175.05	0.00145032	0.836785	0.82868	0.787452		175.05	0.00145032	0.3378	0.3552	0.4067		175.05	-0.00356089	0.742592	0.787072	0.76692		175.05	-0.00328249	0.345774	0.274737	0.275224		175.05	0.030627	0.150316	0.185869	0.150512
180.05	-0.0024947	-0.0235814	-0.0375118	-0.0176638		180.05	-0.00492315	0.188049	0.17523	0.157619		180.05	0.000567299	0.82434	0.828759	0.8575		180.05	0.000567299	0.843563	0.836653	0.791383		180.05	0.000567299	0.3389	0.3581	0.4099		180.05	-0.00314718	0.749347	0.796436	0.774665		180.05	-0.0031593	0.350251	0.278585	0.279249		180.05	0.030948	0.153031	0.190391	0.154258
				VpTLH activity was assayed by triplicate at each pH. Data mean average (n=3)
				pH	U/mg protein	SD
				6	0	0.995021
				7	36.0412	2.31589
				7.5	54.4681	2.17767
				8	100	1.96381
				8.5	95.8626	2.55874
				9	77.1245	3.51419
				10	32.0658	3.75652
				11	10.8289	2.30332

## Sheet: Fig2B
		Absorbance (410 nm)				Absorbance (410 nm)								Absorbance (410 nm)						Absorbance (410 nm)						Absorbance (410 nm)						Absorbance (410 nm)						Absorbance (410 nm)						Absorbance (410 nm)
T= 10ºC						T=20ºC						T=30ºC						T=40ºC						T=50ºC						T=60ºC						T=70ºC						T=80ºC
t(s)	Control	1	2	3		t(s)	Control	1	2	3		t(s)	Control	1	2	3		t(s)	Control	1	2	3		t(s)	Control	1	2	3		t(s)	Control	1	2	3		t(s)	Control	1	2	3		t(s)	Control	1	2	3
0.05	0.00368915	0.0161412	0.00740038	0.0118829		0.05	0.00145674	0.0207099	0.0233005	0.0197338		0.05	0.00306171	0.0334311	0.0201569	0.0375809		0.05	-0.00179433	0.0271999	0.0250607	0.0280637		0.05	-0.00215895	0.0267118	0.0242666	0.0359854		0.05	-0.0053432	0.0411037	0.0412765	0.030803		0.05	-0.000294586	0.0654151	0.0350944	0.0546833		0.05	-0.00270956	-0.000685075	-0.0190391	0.0120768
5.05	0.00370597	0.0210568	0.00731053	0.0155169		5.05	0.0023902	0.0309028	0.0376934	0.0313147		5.05	0.00134712	0.0477062	0.0360553	0.0529438		5.05	-0.0029476	0.0606779	0.0575273	0.0466709		5.05	-0.0021761	0.0766248	0.0575101	0.0791187		5.05	-0.00554853	0.10083	0.0781413	0.0625805		5.05	-0.00370941	0.103022	0.0709725	0.101565		5.05	-0.00395871	0.00924485	-0.00952402	0.017956
10.05	0.00449741	0.0255756	0.015645	0.0237794		10.05	0.00313106	0.0420293	0.0449831	0.0401809		10.05	-0.000361839	0.0623466	0.0506738	0.0670825		10.05	-0.00368755	0.0892365	0.0856744	0.0652557		10.05	-0.00123456	0.0921165	0.0844339	0.110327		10.05	-0.0059071	0.132206	0.108988	0.0859746		10.05	-0.00441132	0.132209	0.1027	0.133797		10.05	-0.00354666	0.0102404	-0.00641849	0.0212805
15.05	0.00319411	0.0304687	0.0359054	0.0263609		15.05	0.00495687	0.050868	0.0577669	0.0519863		15.05	0.00215865	0.0761327	0.0650375	0.0813911		15.05	-0.00537598	0.11352	0.110018	0.0825422		15.05	-0.00394922	0.112712	0.108076	0.143514		15.05	-0.00688047	0.163582	0.133727	0.113158		15.05	-0.00289978	0.157627	0.128751	0.159318		15.05	-0.00380098	0.0111316	-0.00250494	0.0225097
20.05	0.00513747	0.0376984	0.0358612	0.0303644		20.05	0.00655041	0.0620043	0.0655879	0.0610694		20.05	0.00327131	0.0901265	0.0776141	0.094702		20.05	-0.00263891	0.132941	0.132567	0.0999581		20.05	-0.00501456	0.133853	0.127434	0.163059		20.05	-0.00566137	0.195934	0.164893	0.136207		20.05	-0.00117157	0.178715	0.152115	0.17508		20.05	-0.00347893	0.0137	-0.00103591	0.0255036
25.05	0.00371683	0.0441816	0.0302565	0.0370239		25.05	0.00445539	0.0759034	0.0748436	0.0688732		25.05	0.00225711	0.104237	0.090138	0.110941		25.05	-0.00484206	0.163678	0.153858	0.1158		25.05	-0.00559913	0.160248	0.152548	0.178933		25.05	-0.00468193	0.224565	0.195052	0.159134		25.05	-0.00213948	0.198508	0.17451	0.19489		25.05	-0.00380868	0.0141609	0.00294616	0.0290961
30.05	0.00454418	0.0471163	0.035139	0.0416794		30.05	0.00480663	0.0832027	0.0836002	0.0887633		30.05	0.0018566	0.115468	0.103086	0.121039		30.05	-0.00536964	0.179579	0.167771	0.132146		30.05	-0.00540303	0.184401	0.178659	0.201757		30.05	-0.00543488	0.25607	0.225211	0.17802		30.05	-0.00230157	0.215616	0.194306	0.225815		30.05	-0.00246438	0.0140351	0.00475243	0.0303582
35.05	0.00406499	0.0517614	0.0400967	0.0457899		35.05	0.00525782	0.0909096	0.0926649	0.0897142		35.05	0.00267578	0.128897	0.115581	0.132299		35.05	-0.00543867	0.199403	0.17435	0.150437		35.05	-0.00535394	0.208043	0.201414	0.221835		35.05	-0.00459603	0.287366	0.245506	0.198557		35.05	-0.00289067	0.229813	0.211328	0.244049		35.05	-0.00408721	0.0133755	0.00581694	0.0323521
40.05	0.0043413	0.0571206	0.0440013	0.0501396		40.05	0.00578539	0.106279	0.102609	0.0987698		40.05	0.00116625	0.141769	0.126722	0.144923		40.05	-0.00327396	0.220595	0.181652	0.166405		40.05	-0.00503964	0.230211	0.223209	0.242663		40.05	-0.00448844	0.31133	0.275677	0.217956		40.05	0.0011695	0.241379	0.227668	0.257873		40.05	-0.00254658	0.01447	0.00468046	0.0333531
45.05	0.00441077	0.0623056	0.0488616	0.0536768		45.05	0.00696864	0.109555	0.111993	0.106038		45.05	0.00180143	0.153917	0.137835	0.155944		45.05	-0.00412408	0.242412	0.200164	0.181814		45.05	-0.00412726	0.250249	0.243746	0.261529		45.05	-0.00549864	0.339551	0.305069	0.236889		45.05	-0.00232686	0.250884	0.240804	0.264429		45.05	-0.00202329	0.0145083	0.00679622	0.034369
50.05	0.00450563	0.0667575	0.0547067	0.0586211		50.05	0.00580459	0.119644	0.120605	0.114725		50.05	0.00232578	0.16593	0.149085	0.168586		50.05	-0.00512013	0.263246	0.231037	0.199542		50.05	-0.00418997	0.269528	0.263426	0.280659		50.05	-0.00383085	0.350389	0.324763	0.255423		50.05	-0.00278894	0.26021	0.253495	0.269764		50.05	-0.000643721	0.0144567	0.00704059	0.0368288
55.05	0.00404976	0.0712683	0.0593404	0.0625043		55.05	0.00593384	0.127918	0.128814	0.124339		55.05	0.00437769	0.177406	0.16094	0.179046		55.05	-0.00173498	0.28117	0.254219	0.2124		55.05	-0.00342197	0.291038	0.284954	0.299644		55.05	-0.00435125	0.363066	0.343517	0.273156		55.05	-0.00366758	0.266555	0.264132	0.277904		55.05	-0.000967936	0.0145983	0.00788082	0.0379386
60.05	0.00430284	0.0769795	0.0646467	0.0662928		60.05	0.00652477	0.137319	0.136679	0.132869		60.05	0.00221805	0.18867	0.17296	0.191438		60.05	-0.00488905	0.299159	0.271908	0.228073		60.05	-0.00268512	0.31188	0.303997	0.318676		60.05	-0.00424201	0.378854	0.361028	0.285843		60.05	-0.00266582	0.273855	0.272899	0.28726		60.05	-0.000564775	0.0153936	0.00948509	0.0392423
65.05	0.00414532	0.0807289	0.0694659	0.0694335		65.05	0.00709247	0.144206	0.143861	0.141591		65.05	0.00241477	0.200409	0.188024	0.200496		65.05	-0.00587763	0.316351	0.283002	0.243418		65.05	-0.00273003	0.330611	0.322539	0.339334		65.05	-0.00420335	0.391136	0.373812	0.299718		65.05	-0.00239936	0.280066	0.292723	0.296057		65.05	0.00101721	0.0151028	0.0102046	0.0404731
70.05	0.00495134	0.0858123	0.0738869	0.0759613		70.05	0.00716776	0.15287	0.153133	0.149005		70.05	0.0025012	0.210959	0.194648	0.211192		70.05	-0.00563935	0.332959	0.292713	0.259202		70.05	-0.00484405	0.347914	0.340745	0.357079		70.05	-0.00361932	0.407904	0.395306	0.313622		70.05	-0.00227943	0.286502	0.290579	0.303938		70.05	0.00065528	0.0160601	0.0117115	0.0420777
75.05	0.00445779	0.0907871	0.0772424	0.0795328		75.05	0.006627	0.159493	0.161688	0.155955		75.05	0.00592796	0.221371	0.204212	0.221966		75.05	-0.00427436	0.34782	0.305897	0.274036		75.05	-0.00435289	0.365906	0.358089	0.375573		75.05	-0.00426098	0.420215	0.409908	0.328665		75.05	-0.00139642	0.292505	0.298086	0.30931		75.05	0.00124265	0.0170977	0.0118781	0.0435592
80.05	0.0046117	0.097221	0.0806744	0.0826746		80.05	0.00621629	0.168035	0.170109	0.164205		80.05	0.00815703	0.233761	0.216153	0.233362		80.05	-0.00715734	0.361426	0.317867	0.289355		80.05	-0.00487037	0.389481	0.375718	0.391637		80.05	-0.00295958	0.432205	0.425411	0.341921		80.05	-0.000695672	0.298716	0.308023	0.315776		80.05	0.00136818	0.0171601	0.0116818	0.0449653
85.05	0.00394675	0.100457	0.0863298	0.0857554		85.05	0.00671409	0.17315	0.178888	0.171507		85.05	0.00461448	0.243541	0.225089	0.243249		85.05	-0.00556585	0.373173	0.332053	0.30308		85.05	-0.0053318	0.401723	0.392988	0.402076		85.05	-0.00419084	0.441645	0.443516	0.355432		85.05	-0.00120079	0.303702	0.313959	0.321971		85.05	0.00100185	0.0160743	0.0138384	0.0454158
90.05	0.00465927	0.103335	0.0909352	0.0903172		90.05	0.00678278	0.182263	0.186407	0.178965		90.05	0.00147952	0.253373	0.236432	0.252544		90.05	-0.00587206	0.385098	0.347955	0.317356		90.05	-0.00477155	0.417458	0.413602	0.415774		90.05	-0.00320998	0.453182	0.456976	0.368809		90.05	-0.00110651	0.309813	0.322019	0.325892		90.05	0.00107215	0.0178692	0.0151238	0.0460922
95.05	0.0043733	0.107461	0.0938285	0.092701		95.05	0.00620172	0.190219	0.194741	0.185062		95.05	0.00265046	0.264541	0.244448	0.265042		95.05	-0.00581475	0.397104	0.361081	0.332281		95.05	-0.00376536	0.434334	0.428627	0.426791		95.05	0.00339495	0.468372	0.474165	0.382244		95.05	-0.00128541	0.314344	0.328704	0.331412		95.05	0.00160489	0.0173171	0.015071	0.0481689
100.05	0.00436012	0.110979	0.0991505	0.0967657		100.05	0.0069829	0.197178	0.199739	0.193257		100.05	0.00232146	0.274884	0.25566	0.273078		100.05	-0.00579718	0.408968	0.375062	0.344787		100.05	-0.00443161	0.449606	0.445522	0.440346		100.05	0.00464299	0.482988	0.487903	0.393786		100.05	8.54321e-05	0.319371	0.336165	0.33474		100.05	0.00170558	0.017184	0.0173705	0.0484402
105.05	0.00519203	0.11469	0.104063	0.101609		105.05	0.00965379	0.204223	0.208082	0.200472		105.05	0.00199984	0.285357	0.265515	0.28275		105.05	-0.00678614	0.421097	0.388652	0.359235		105.05	-0.00472587	0.464278	0.463963	0.459125		105.05	0.00448421	0.493228	0.499063	0.406497		105.05	0.00025974	0.323654	0.343309	0.338286		105.05	0.00238215	0.0178145	0.0154948	0.0497254
110.05	0.0048932	0.118655	0.106873	0.105198		110.05	0.00803495	0.211107	0.215446	0.207847		110.05	0.00231972	0.294822	0.275121	0.294357		110.05	-0.00493855	0.432363	0.398896	0.372729		110.05	-0.0044312	0.480415	0.481186	0.472543		110.05	0.00527618	0.50227	0.509549	0.417637		110.05	0.00114352	0.329174	0.349628	0.343415		110.05	0.00251815	0.0172993	0.0177268	0.0484548
115.05	0.00488982	0.12313	0.111485	0.107254		115.05	0.00819588	0.218224	0.222621	0.214536		115.05	0.00322528	0.306104	0.285013	0.302153		115.05	-0.00678227	0.445638	0.410251	0.387083		115.05	-0.00315838	0.49511	0.498181	0.486637		115.05	0.00446179	0.508407	0.523948	0.428318		115.05	0.000721549	0.332555	0.356404	0.344964		115.05	0.00339607	0.0174891	0.017056	0.0504731
120.05	0.00431782	0.127324	0.115	0.114271		120.05	0.00891917	0.224148	0.230485	0.220203		120.05	0.00355637	0.315924	0.295034	0.311799		120.05	-0.00659828	0.458698	0.421949	0.400977		120.05	-0.00388658	0.512435	0.514785	0.500346		120.05	0.00329882	0.51325	0.530251	0.441044		120.05	0.000883428	0.336549	0.363365	0.348836		120.05	0.00443284	0.0180141	0.0178368	0.0508585
125.05	0.00473131	0.131625	0.118355	0.119133		125.05	0.00767023	0.230984	0.237179	0.22807		125.05	0.00299936	0.325032	0.304094	0.321099		125.05	-0.00468695	0.470734	0.43337	0.413271		125.05	-0.00458072	0.526747	0.531158	0.515473		125.05	0.0028339	0.51887	0.537784	0.452499		125.05	0.00041471	0.341685	0.370347	0.352139		125.05	0.00515041	0.0185358	0.017792	0.0520969
130.05	0.00413976	0.135819	0.122704	0.121313		130.05	0.00853385	0.237601	0.244125	0.236914		130.05	0.00346245	0.33521	0.311854	0.330281		130.05	-0.0060028	0.48466	0.446683	0.426964		130.05	-0.00304365	0.539612	0.544488	0.528137		130.05	0.00329204	0.528798	0.545068	0.462385		130.05	0.00152828	0.345154	0.377738	0.354636		130.05	0.00593444	0.0174407	0.0181373	0.0529152
135.05	0.00449171	0.140193	0.126681	0.125886		135.05	0.0090725	0.244119	0.25109	0.243212		135.05	0.00300728	0.344174	0.322062	0.338755		135.05	-0.00575508	0.498002	0.458403	0.439675		135.05	-0.00395697	0.553573	0.560262	0.542601		135.05	0.00378968	0.535281	0.552952	0.471006		135.05	0.00246941	0.349946	0.38419	0.358762		135.05	0.00690359	0.0190549	0.0181153	0.0536523
140.05	0.00450388	0.143695	0.130173	0.133705		140.05	0.00787331	0.250509	0.257529	0.249393		140.05	0.00379015	0.352722	0.331869	0.347349		140.05	-0.00567517	0.510793	0.470631	0.453151		140.05	-0.00251194	0.569237	0.574928	0.555611		140.05	0.00408679	0.543903	0.561698	0.481219		140.05	0.00254786	0.353969	0.390632	0.360928		140.05	0.00680322	0.0191071	0.0180269	0.052915
145.05	0.00406659	0.147387	0.133693	0.133293		145.05	0.00881383	0.256143	0.264605	0.255495		145.05	0.00352701	0.362503	0.341618	0.355946		145.05	-0.00569275	0.523084	0.480555	0.465218		145.05	-0.003298	0.580055	0.588639	0.566087		145.05	0.00495148	0.549897	0.562933	0.489171		145.05	0.00340301	0.358893	0.397205	0.361945		145.05	0.00741529	0.0192199	0.0193132	0.0545934
150.05	0.0048182	0.150427	0.13725	0.133209		150.05	0.00839971	0.261554	0.27052	0.263512		150.05	0.00381106	0.370073	0.348679	0.363798		150.05	-0.00621067	0.53431	0.489998	0.478848		150.05	-0.00331506	0.592182	0.603363	0.576519		150.05	0.00695872	0.55541	0.571459	0.495794		150.05	0.00361478	0.362655	0.405078	0.364167		150.05	0.0080427	0.0190063	0.01946	0.0547912
155.05	0.00410594	0.154294	0.141632	0.135277		155.05	0.00904424	0.267821	0.277169	0.269413		155.05	0.00404438	0.378407	0.357665	0.37251		155.05	-0.00533706	0.544416	0.498005	0.490141		155.05	-0.00166123	0.604341	0.616439	0.587149		155.05	0.00786635	0.558869	0.574989	0.503646		155.05	0.00322887	0.367007	0.399703	0.366146		155.05	0.00785889	0.0199055	0.0187483	0.0549546
160.05	0.00427716	0.157842	0.144792	0.137827		160.05	0.00940033	0.274431	0.283505	0.273942		160.05	0.00454327	0.388196	0.365883	0.380542		160.05	-0.00579243	0.552225	0.509162	0.503953		160.05	-0.00227423	0.61567	0.630636	0.597448		160.05	0.00803194	0.562087	0.579774	0.511375		160.05	0.00291896	0.372646	0.405261	0.367645		160.05	0.00910152	0.019792	0.0197622	0.0560817
165.05	0.0045107	0.160504	0.14919	0.14043		165.05	0.00836559	0.280424	0.2894	0.279941		165.05	0.0070308	0.396855	0.374197	0.388504		165.05	-0.00390684	0.558103	0.519749	0.515216		165.05	-0.00194769	0.626555	0.644648	0.607668		165.05	0.00938279	0.56548	0.583916	0.519854		165.05	0.00453333	0.373695	0.411452	0.369777		165.05	0.00746179	0.0194136	0.0196801	0.0571037
170.05	0.0051541	0.164848	0.152358	0.142978		170.05	0.00917343	0.285167	0.294977	0.285483		170.05	0.00561441	0.40567	0.382937	0.396404		170.05	-0.00534463	0.56382	0.529575	0.526297		170.05	-0.00353228	0.637827	0.656968	0.6156		170.05	0.0100883	0.568041	0.588638	0.527864		170.05	0.0049614	0.376879	0.416396	0.371374		170.05	0.00664513	0.019702	0.0198841	0.0577953
175.05	0.00441752	0.16822	0.155737	0.145851		175.05	0.0104487	0.291035	0.301808	0.292268		175.05	0.00528769	0.413272	0.391768	0.404385		175.05	-0.00553759	0.571459	0.540134	0.538123		175.05	-0.00211094	0.670351	0.665783	0.622927		175.05	0.0112893	0.570788	0.592651	0.533351		175.05	0.00557135	0.38043	0.421729	0.373032		175.05	0.00589518	0.0199025	0.0199405	0.056948
180.05	0.00450168	0.171414	0.160023	0.148594		180.05	0.0106892	0.295634	0.307188	0.298252		180.05	0.00706345	0.421986	0.400289	0.41236		180.05	-0.00409044	0.576353	0.548144	0.549895		180.05	-0.00222241	0.6578	0.677613	0.630421		180.05	0.0123499	0.574324	0.596878	0.539926		180.05	0.00587383	0.38457	0.426334	0.374685		180.05	0.00673667	0.0198716	0.0199076	0.0568448
185.05	0.00416004	0.175278	0.162703	0.150897		185.05	0.0100692	0.300929	0.312119	0.304363		185.05	0.00450388	0.430569	0.408592	0.420998		185.05	-0.00464833	0.579518	0.5576	0.562962		185.05	-0.00225249	0.666607	0.687308	0.640407		185.05	0.0132149	0.57536	0.601384	0.546482		185.05	0.0060994	0.388615	0.427638	0.376302		185.05	0.00749421	0.0194565	0.0211927	0.0582988
190.05	0.00502461	0.178557	0.165763	0.154637		190.05	0.00936497	0.307177	0.318177	0.309314		190.05	0.00559542	0.437562	0.417586	0.428877		190.05	-0.00334352	0.583054	0.564501	0.574477		190.05	-0.00173467	0.676152	0.698392	0.647785		190.05	0.0136589	0.577556	0.604814	0.553842		190.05	0.00537136	0.393008	0.428942	0.378682		190.05	0.00782615	0.0200715	0.02122	0.0590162
195.05	0.00432124	0.18148	0.168916	0.157931		195.05	0.00953883	0.312723	0.32354	0.314477		195.05	0.00564228	0.445901	0.424492	0.436955		195.05	-0.00441819	0.586085	0.572029	0.586228		195.05	-0.00274552	0.685131	0.70739	0.654265		195.05	0.0144685	0.578358	0.606851	0.559018		195.05	0.00625986	0.395867	0.430246	0.37938		195.05	0.00736663	0.0199304	0.0217865	0.0593365
200.05	0.00483715	0.185338	0.171884	0.161692		200.05	0.0100874	0.318316	0.328818	0.321011		200.05	0.00718529	0.45388	0.43274	0.444382		200.05	-0.00466851	0.59225	0.581563	0.597056		200.05	-0.000411858	0.695376	0.719063	0.662406		200.05	0.017068	0.579245	0.608079	0.565893		200.05	0.00715802	0.399562	0.43155	0.380763		200.05	0.00758058	0.0199565	0.0205784	0.0595633
205.05	0.00426984	0.189659	0.175953	0.164297		205.05	0.0103196	0.323582	0.334604	0.326522		205.05	0.00681492	0.461629	0.441269	0.452708		205.05	-0.00400704	0.597826	0.588458	0.60893		205.05	0.000408828	0.701679	0.724478	0.66774		205.05	0.0162136	0.580366	0.609876	0.572038		205.05	0.00655181	0.404256	0.432854	0.380703		205.05	0.00813128	0.0201536	0.0204758	0.0595499
210.05	0.00467149	0.191785	0.178882	0.16882		210.05	0.00982807	0.328179	0.340575	0.331831		210.05	0.00619503	0.470105	0.448913	0.460722		210.05	-0.00417187	0.60435	0.597149	0.619838		210.05	-0.000592953	0.710623	0.732404	0.674085		210.05	0.0179823	0.582156	0.612051	0.576292		210.05	0.00699171	0.406341	0.434158	0.382084		210.05	0.00829426	0.0211726	0.0212107	0.0603744
215.05	0.00471022	0.195197	0.181692	0.1713		215.05	0.00969466	0.333389	0.34659	0.337945		215.05	0.00583093	0.476518	0.456888	0.46739		215.05	-0.00559938	0.609367	0.603588	0.630418		215.05	-0.00221247	0.717269	0.740291	0.679084		215.05	0.0185214	0.582081	0.612436	0.581309		215.05	0.00817003	0.410932	0.435462	0.383936		215.05	0.00808903	0.0206896	0.0213934	0.0596106
220.05	0.00460257	0.198701	0.185771	0.175146		220.05	0.00920146	0.339902	0.351885	0.342959		220.05	0.00654697	0.484463	0.463806	0.474954		220.05	-0.00416715	0.613611	0.610335	0.642254		220.05	-0.000693914	0.724585	0.749721	0.686529		220.05	0.0190409	0.583739	0.61399	0.585337		220.05	0.00654681	0.414099	0.436766	0.385114		220.05	0.00902535	0.0206295	0.0221265	0.0597811
225.05	0.00537008	0.201676	0.188586	0.178391		225.05	0.00920172	0.344656	0.357897	0.349359		225.05	0.00663517	0.49173	0.471634	0.482245		225.05	-0.00484308	0.620334	0.617969	0.650389		225.05	-0.00164839	0.728977	0.757315	0.692228		225.05	0.0200532	0.58503	0.615079	0.590326		225.05	0.00884593	0.416788	0.43807	0.385505		225.05	0.012573	0.0210915	0.0220081	0.0607566
230.05	0.00446833	0.204784	0.191771	0.182005		230.05	0.00855399	0.348781	0.363501	0.355319		230.05	0.00736434	0.499854	0.478624	0.490777		230.05	-0.00607561	0.623942	0.625422	0.663323		230.05	-0.000850298	0.737455	0.761277	0.695444		230.05	0.0208745	0.585975	0.616079	0.594675		230.05	0.0104913	0.422428	0.439374	0.387936		230.05	0.0095935	0.0210409	0.0226299	0.0613281
235.05	0.00510394	0.207421	0.194992	0.18372		235.05	0.00918966	0.353128	0.369738	0.359825		235.05	0.0082154	0.507598	0.487295	0.496085		235.05	-0.00518249	0.628162	0.631176	0.673538		235.05	-0.0010873	0.744582	0.768133	0.701013		235.05	0.023003	0.586301	0.617766	0.597304		235.05	0.00903793	0.426262	0.440678	0.387926		235.05	0.00998154	0.0207688	0.0232541	0.0612575
240.05	0.00474777	0.211289	0.198418	0.187003		240.05	0.00958967	0.357641	0.374769	0.365681		240.05	0.0062184	0.514165	0.494145	0.503331		240.05	-0.00474631	0.633809	0.640225	0.682726		240.05	-0.00117033	0.745312	0.772567	0.70703		240.05	0.0235301	0.586241	0.619473	0.602701		240.05	0.00910879	0.428498	0.441982	0.389124		240.05	0.0105441	0.0212115	0.0233943	0.0621472
245.05	0.00518318	0.214855	0.200758	0.190373		245.05	0.00933146	0.363202	0.379699	0.370057		245.05	0.00540142	0.5223	0.501629	0.511503		245.05	-0.00519769	0.640263	0.645405	0.693716		245.05	-0.000852106	0.752339	0.779252	0.711707		245.05	0.0236747	0.587914	0.61931	0.606337		245.05	0.00980614	0.4316	0.443286	0.390041		245.05	0.0109606	0.0204127	0.0242113	0.0612412
250.05	0.00471945	0.216645	0.203777	0.194235		250.05	0.00924334	0.367922	0.385097	0.374953		250.05	0.00613335	0.528216	0.50906	0.516473		250.05	-0.0052382	0.645211	0.651032	0.702759		250.05	-0.000697119	0.754757	0.783485	0.719447		250.05	0.0240554	0.588392	0.619982	0.610295		250.05	0.0104261	0.43586	0.44459	0.390974		250.05	0.0116787	0.0201281	0.023882	0.0608565
255.05	0.00474479	0.220812	0.206019	0.196386		255.05	0.00997076	0.372958	0.390414	0.379691		255.05	0.00671409	0.536152	0.515762	0.522847		255.05	-0.00422699	0.651123	0.657771	0.71415		255.05	-0.000413875	0.759927	0.78832	0.721491		255.05	0.0255391	0.587624	0.620963	0.612447		255.05	0.0111277	0.439052	0.445894	0.392177		255.05	0.011066	0.0210338	0.0238068	0.0608286
260.05	0.00490733	0.222715	0.208165	0.199339		260.05	0.00936161	0.37711	0.395716	0.38375		260.05	0.00667789	0.542471	0.524238	0.529944		260.05	-0.00237747	0.662008	0.664285	0.721984		260.05	-0.000379633	0.765977	0.793258	0.724576		260.05	0.0264739	0.588941	0.621379	0.616685		260.05	0.0103991	0.443596	0.447198	0.38045		260.05	0.0116692	0.0212749	0.024939	0.0609426
265.05	0.00529751	0.22611	0.211487	0.202154		265.05	0.00902831	0.381578	0.399466	0.388931		265.05	0.00658739	0.548646	0.53121	0.536869		265.05	-0.00319651	0.669157	0.669126	0.732663		265.05	0.000584147	0.76988	0.796837	0.730388		265.05	0.0269546	0.589465	0.622297	0.619708		265.05	0.0151613	0.443731	0.448502	0.382114		265.05	0.0121355	0.0223332	0.024235	0.0612088
270.05	0.00532466	0.229225	0.21411	0.203882		270.05	0.00967613	0.387118	0.404467	0.393254		270.05	0.00668196	0.554742	0.537018	0.542851		270.05	-0.00330437	0.678207	0.674045	0.742167		270.05	8.50437e-05	0.773965	0.802951	0.733247		270.05	0.027401	0.589007	0.622309	0.623602		270.05	0.0146125	0.448029	0.449806	0.391003		270.05	0.0122914	0.0224694	0.0244799	0.062176
275.05	0.00582615	0.231889	0.217678	0.206416		275.05	0.0100273	0.39102	0.409972	0.398		275.05	0.0068794	0.562044	0.543305	0.549227		275.05	-0.00424837	0.683221	0.679323	0.752862		275.05	0.000457802	0.778833	0.805584	0.73789		275.05	0.0280965	0.591196	0.623704	0.625448		275.05	0.0158438	0.450153	0.45111	0.390666		275.05	0.0131682	0.0209687	0.0250477	0.0608162
280.05	0.00578337	0.235667	0.219697	0.208497		280.05	0.00969059	0.395821	0.413937	0.402163		280.05	0.00806902	0.568951	0.549473	0.556798		280.05	-0.00350301	0.69302	0.684194	0.761042		280.05	0.000453941	0.78279	0.809423	0.740038		280.05	0.0290595	0.589887	0.625598	0.628331		280.05	0.0156935	0.45347	0.452414	0.392178		280.05	0.0132175	0.0213453	0.0250796	0.0612813
285.05	0.00585491	0.237859	0.222408	0.210446		285.05	0.0106248	0.400438	0.419315	0.406496		285.05	0.00748905	0.57369	0.556809	0.561742		285.05	-0.00348165	0.697819	0.689031	0.769138		285.05	0.00320243	0.785359	0.81237	0.744881		285.05	0.0303912	0.589724	0.625805	0.631233		285.05	0.0179051	0.456968	0.453718	0.392764		285.05	0.0136531	0.0215975	0.0258441	0.0615787
290.05	0.00514954	0.240162	0.225652	0.213068		290.05	0.0104855	0.404394	0.423747	0.41068		290.05	0.00757902	0.580644	0.563566	0.567739		290.05	-0.00444858	0.705154	0.695483	0.778579		290.05	0.00205143	0.788083	0.817116	0.749439		290.05	0.0313596	0.590249	0.626002	0.633721		290.05	0.0183418	0.460858	0.455022	0.393126		290.05	0.0143461	0.0209557	0.025555	0.0612408
295.05	0.00601716	0.24235	0.228479	0.216099		295.05	0.00903254	0.408606	0.429202	0.415261		295.05	0.00751791	0.586953	0.569039	0.574215		295.05	-0.00288466	0.711277	0.699575	0.787484		295.05	0.00152547	0.792852	0.817999	0.750675		295.05	0.032097	0.590373	0.626139	0.635971		295.05	0.0173419	0.462981	0.456326	0.393626		295.05	0.0134247	0.0210358	0.0253539	0.0622934
300.05	0.00585793	0.245121	0.231051	0.218882		300.05	0.00939922	0.413944	0.433878	0.420272		300.05	0.00873942	0.592858	0.574304	0.580003		300.05	-0.00603895	0.714835	0.704518	0.795706		300.05	0.00177139	0.795234	0.824035	0.753667		300.05	0.0299349	0.590729	0.62843	0.637246		300.05	0.0156598	0.465819	0.45763	0.394149		300.05	0.0166876	0.0212151	0.0265428	0.062862
			VpTLH activity was assayed by triplicate at each temperature. Data mean average (n=3)
			T(ºC)	U/mg protein	SD
			10	24.2825	1.42839
			20	44.2343	0.780269
			30	61.1331	1.33995
			40	84.8596	2.64138
			50	100	6.29227
			60	78.7767	5.22967
			70	47.1899	7.90497
			80	2.1123	2.37426

## Sheet: Fig2C
		Absorbance (410 nm)						Absorbance (410 nm)						Absorbance (410 nm)						Absorbance (410 nm)						Absorbance (410 nm)						Absorbance (410 nm)						Absorbance (410 nm)						Absorbance (410 nm)
T= 10ºC						T=20ºC						T=30ºC						T=40ºC						T=50ºC						T=60ºC						T=70ºC						T=80ºC
t(s)	Control	1	2	3		t(s)	Control	1	2	3		t(s)	Control	1	2	3		t(s)	Control	1	2	3		t(s)	Control	1	2	3		t(s)	Control	1	2	3		t(s)	Control	1	2	3		t(s)	Control	1	2	3
0.05	0.00368915	0.0161412	0.00740038	0.0118829		0.05	0.00145674	0.0207099	0.0233005	0.0197338		0.05	0.00306171	0.0334311	0.0201569	0.0375809		0.05	-0.00179433	0.0271999	0.0250607	0.0280637		0.05	-0.00215895	0.0267118	0.0242666	0.0359854		0.05	-0.0053432	0.0411037	0.0412765	0.030803		0.05	-0.000294586	0.0654151	0.0350944	0.0546833		0.05	-0.00270956	-0.000685075	-0.0190391	0.0120768
5.05	0.00370597	0.0210568	0.00731053	0.0155169		5.05	0.0023902	0.0309028	0.0376934	0.0313147		5.05	0.00134712	0.0477062	0.0360553	0.0529438		5.05	-0.0029476	0.0606779	0.0575273	0.0466709		5.05	-0.0021761	0.0766248	0.0575101	0.0791187		5.05	-0.00554853	0.10083	0.0781413	0.0625805		5.05	-0.00370941	0.103022	0.0709725	0.101565		5.05	-0.00395871	0.00924485	-0.00952402	0.017956
10.05	0.00449741	0.0255756	0.015645	0.0237794		10.05	0.00313106	0.0420293	0.0449831	0.0401809		10.05	-0.000361839	0.0623466	0.0506738	0.0670825		10.05	-0.00368755	0.0892365	0.0856744	0.0652557		10.05	-0.00123456	0.0921165	0.0844339	0.110327		10.05	-0.0059071	0.132206	0.108988	0.0859746		10.05	-0.00441132	0.132209	0.1027	0.133797		10.05	-0.00354666	0.0102404	-0.00641849	0.0212805
15.05	0.00319411	0.0304687	0.0359054	0.0263609		15.05	0.00495687	0.050868	0.0577669	0.0519863		15.05	0.00215865	0.0761327	0.0650375	0.0813911		15.05	-0.00537598	0.11352	0.110018	0.0825422		15.05	-0.00394922	0.112712	0.108076	0.143514		15.05	-0.00688047	0.163582	0.133727	0.113158		15.05	-0.00289978	0.157627	0.128751	0.159318		15.05	-0.00380098	0.0111316	-0.00250494	0.0225097
20.05	0.00513747	0.0376984	0.0358612	0.0303644		20.05	0.00655041	0.0620043	0.0655879	0.0610694		20.05	0.00327131	0.0901265	0.0776141	0.094702		20.05	-0.00263891	0.132941	0.132567	0.0999581		20.05	-0.00501456	0.133853	0.127434	0.163059		20.05	-0.00566137	0.195934	0.164893	0.136207		20.05	-0.00117157	0.178715	0.152115	0.17508		20.05	-0.00347893	0.0137	-0.00103591	0.0255036
25.05	0.00371683	0.0441816	0.0302565	0.0370239		25.05	0.00445539	0.0759034	0.0748436	0.0688732		25.05	0.00225711	0.104237	0.090138	0.110941		25.05	-0.00484206	0.163678	0.153858	0.1158		25.05	-0.00559913	0.160248	0.152548	0.178933		25.05	-0.00468193	0.224565	0.195052	0.159134		25.05	-0.00213948	0.198508	0.17451	0.19489		25.05	-0.00380868	0.0141609	0.00294616	0.0290961
30.05	0.00454418	0.0471163	0.035139	0.0416794		30.05	0.00480663	0.0832027	0.0836002	0.0887633		30.05	0.0018566	0.115468	0.103086	0.121039		30.05	-0.00536964	0.179579	0.167771	0.132146		30.05	-0.00540303	0.184401	0.178659	0.201757		30.05	-0.00543488	0.25607	0.225211	0.17802		30.05	-0.00230157	0.215616	0.194306	0.225815		30.05	-0.00246438	0.0140351	0.00475243	0.0303582
35.05	0.00406499	0.0517614	0.0400967	0.0457899		35.05	0.00525782	0.0909096	0.0926649	0.0897142		35.05	0.00267578	0.128897	0.115581	0.132299		35.05	-0.00543867	0.199403	0.17435	0.150437		35.05	-0.00535394	0.208043	0.201414	0.221835		35.05	-0.00459603	0.287366	0.245506	0.198557		35.05	-0.00289067	0.229813	0.211328	0.244049		35.05	-0.00408721	0.0133755	0.00581694	0.0323521
40.05	0.0043413	0.0571206	0.0440013	0.0501396		40.05	0.00578539	0.106279	0.102609	0.0987698		40.05	0.00116625	0.141769	0.126722	0.144923		40.05	-0.00327396	0.220595	0.181652	0.166405		40.05	-0.00503964	0.230211	0.223209	0.242663		40.05	-0.00448844	0.31133	0.275677	0.217956		40.05	0.0011695	0.241379	0.227668	0.257873		40.05	-0.00254658	0.01447	0.00468046	0.0333531
45.05	0.00441077	0.0623056	0.0488616	0.0536768		45.05	0.00696864	0.109555	0.111993	0.106038		45.05	0.00180143	0.153917	0.137835	0.155944		45.05	-0.00412408	0.242412	0.200164	0.181814		45.05	-0.00412726	0.250249	0.243746	0.261529		45.05	-0.00549864	0.339551	0.305069	0.236889		45.05	-0.00232686	0.250884	0.240804	0.264429		45.05	-0.00202329	0.0145083	0.00679622	0.034369
50.05	0.00450563	0.0667575	0.0547067	0.0586211		50.05	0.00580459	0.119644	0.120605	0.114725		50.05	0.00232578	0.16593	0.149085	0.168586		50.05	-0.00512013	0.263246	0.231037	0.199542		50.05	-0.00418997	0.269528	0.263426	0.280659		50.05	-0.00383085	0.350389	0.324763	0.255423		50.05	-0.00278894	0.26021	0.253495	0.269764		50.05	-0.000643721	0.0144567	0.00704059	0.0368288
55.05	0.00404976	0.0712683	0.0593404	0.0625043		55.05	0.00593384	0.127918	0.128814	0.124339		55.05	0.00437769	0.177406	0.16094	0.179046		55.05	-0.00173498	0.28117	0.254219	0.2124		55.05	-0.00342197	0.291038	0.284954	0.299644		55.05	-0.00435125	0.363066	0.343517	0.273156		55.05	-0.00366758	0.266555	0.264132	0.277904		55.05	-0.000967936	0.0145983	0.00788082	0.0379386
60.05	0.00430284	0.0769795	0.0646467	0.0662928		60.05	0.00652477	0.137319	0.136679	0.132869		60.05	0.00221805	0.18867	0.17296	0.191438		60.05	-0.00488905	0.299159	0.271908	0.228073		60.05	-0.00268512	0.31188	0.303997	0.318676		60.05	-0.00424201	0.378854	0.361028	0.285843		60.05	-0.00266582	0.273855	0.272899	0.28726		60.05	-0.000564775	0.0153936	0.00948509	0.0392423
65.05	0.00414532	0.0807289	0.0694659	0.0694335		65.05	0.00709247	0.144206	0.143861	0.141591		65.05	0.00241477	0.200409	0.188024	0.200496		65.05	-0.00587763	0.316351	0.283002	0.243418		65.05	-0.00273003	0.330611	0.322539	0.339334		65.05	-0.00420335	0.391136	0.373812	0.299718		65.05	-0.00239936	0.280066	0.292723	0.296057		65.05	0.00101721	0.0151028	0.0102046	0.0404731
70.05	0.00495134	0.0858123	0.0738869	0.0759613		70.05	0.00716776	0.15287	0.153133	0.149005		70.05	0.0025012	0.210959	0.194648	0.211192		70.05	-0.00563935	0.332959	0.292713	0.259202		70.05	-0.00484405	0.347914	0.340745	0.357079		70.05	-0.00361932	0.407904	0.395306	0.313622		70.05	-0.00227943	0.286502	0.290579	0.303938		70.05	0.00065528	0.0160601	0.0117115	0.0420777
75.05	0.00445779	0.0907871	0.0772424	0.0795328		75.05	0.006627	0.159493	0.161688	0.155955		75.05	0.00592796	0.221371	0.204212	0.221966		75.05	-0.00427436	0.34782	0.305897	0.274036		75.05	-0.00435289	0.365906	0.358089	0.375573		75.05	-0.00426098	0.420215	0.409908	0.328665		75.05	-0.00139642	0.292505	0.298086	0.30931		75.05	0.00124265	0.0170977	0.0118781	0.0435592
80.05	0.0046117	0.097221	0.0806744	0.0826746		80.05	0.00621629	0.168035	0.170109	0.164205		80.05	0.00815703	0.233761	0.216153	0.233362		80.05	-0.00715734	0.361426	0.317867	0.289355		80.05	-0.00487037	0.389481	0.375718	0.391637		80.05	-0.00295958	0.432205	0.425411	0.341921		80.05	-0.000695672	0.298716	0.308023	0.315776		80.05	0.00136818	0.0171601	0.0116818	0.0449653
85.05	0.00394675	0.100457	0.0863298	0.0857554		85.05	0.00671409	0.17315	0.178888	0.171507		85.05	0.00461448	0.243541	0.225089	0.243249		85.05	-0.00556585	0.373173	0.332053	0.30308		85.05	-0.0053318	0.401723	0.392988	0.402076		85.05	-0.00419084	0.441645	0.443516	0.355432		85.05	-0.00120079	0.303702	0.313959	0.321971		85.05	0.00100185	0.0160743	0.0138384	0.0454158
90.05	0.00465927	0.103335	0.0909352	0.0903172		90.05	0.00678278	0.182263	0.186407	0.178965		90.05	0.00147952	0.253373	0.236432	0.252544		90.05	-0.00587206	0.385098	0.347955	0.317356		90.05	-0.00477155	0.417458	0.413602	0.415774		90.05	-0.00320998	0.453182	0.456976	0.368809		90.05	-0.00110651	0.309813	0.322019	0.325892		90.05	0.00107215	0.0178692	0.0151238	0.0460922
95.05	0.0043733	0.107461	0.0938285	0.092701		95.05	0.00620172	0.190219	0.194741	0.185062		95.05	0.00265046	0.264541	0.244448	0.265042		95.05	-0.00581475	0.397104	0.361081	0.332281		95.05	-0.00376536	0.434334	0.428627	0.426791		95.05	0.00339495	0.468372	0.474165	0.382244		95.05	-0.00128541	0.314344	0.328704	0.331412		95.05	0.00160489	0.0173171	0.015071	0.0481689
100.05	0.00436012	0.110979	0.0991505	0.0967657		100.05	0.0069829	0.197178	0.199739	0.193257		100.05	0.00232146	0.274884	0.25566	0.273078		100.05	-0.00579718	0.408968	0.375062	0.344787		100.05	-0.00443161	0.449606	0.445522	0.440346		100.05	0.00464299	0.482988	0.487903	0.393786		100.05	8.54321e-05	0.319371	0.336165	0.33474		100.05	0.00170558	0.017184	0.0173705	0.0484402
105.05	0.00519203	0.11469	0.104063	0.101609		105.05	0.00965379	0.204223	0.208082	0.200472		105.05	0.00199984	0.285357	0.265515	0.28275		105.05	-0.00678614	0.421097	0.388652	0.359235		105.05	-0.00472587	0.464278	0.463963	0.459125		105.05	0.00448421	0.493228	0.499063	0.406497		105.05	0.00025974	0.323654	0.343309	0.338286		105.05	0.00238215	0.0178145	0.0154948	0.0497254
110.05	0.0048932	0.118655	0.106873	0.105198		110.05	0.00803495	0.211107	0.215446	0.207847		110.05	0.00231972	0.294822	0.275121	0.294357		110.05	-0.00493855	0.432363	0.398896	0.372729		110.05	-0.0044312	0.480415	0.481186	0.472543		110.05	0.00527618	0.50227	0.509549	0.417637		110.05	0.00114352	0.329174	0.349628	0.343415		110.05	0.00251815	0.0172993	0.0177268	0.0484548
115.05	0.00488982	0.12313	0.111485	0.107254		115.05	0.00819588	0.218224	0.222621	0.214536		115.05	0.00322528	0.306104	0.285013	0.302153		115.05	-0.00678227	0.445638	0.410251	0.387083		115.05	-0.00315838	0.49511	0.498181	0.486637		115.05	0.00446179	0.508407	0.523948	0.428318		115.05	0.000721549	0.332555	0.356404	0.344964		115.05	0.00339607	0.0174891	0.017056	0.0504731
120.05	0.00431782	0.127324	0.115	0.114271		120.05	0.00891917	0.224148	0.230485	0.220203		120.05	0.00355637	0.315924	0.295034	0.311799		120.05	-0.00659828	0.458698	0.421949	0.400977		120.05	-0.00388658	0.512435	0.514785	0.500346		120.05	0.00329882	0.51325	0.530251	0.441044		120.05	0.000883428	0.336549	0.363365	0.348836		120.05	0.00443284	0.0180141	0.0178368	0.0508585
125.05	0.00473131	0.131625	0.118355	0.119133		125.05	0.00767023	0.230984	0.237179	0.22807		125.05	0.00299936	0.325032	0.304094	0.321099		125.05	-0.00468695	0.470734	0.43337	0.413271		125.05	-0.00458072	0.526747	0.531158	0.515473		125.05	0.0028339	0.51887	0.537784	0.452499		125.05	0.00041471	0.341685	0.370347	0.352139		125.05	0.00515041	0.0185358	0.017792	0.0520969
130.05	0.00413976	0.135819	0.122704	0.121313		130.05	0.00853385	0.237601	0.244125	0.236914		130.05	0.00346245	0.33521	0.311854	0.330281		130.05	-0.0060028	0.48466	0.446683	0.426964		130.05	-0.00304365	0.539612	0.544488	0.528137		130.05	0.00329204	0.528798	0.545068	0.462385		130.05	0.00152828	0.345154	0.377738	0.354636		130.05	0.00593444	0.0174407	0.0181373	0.0529152
135.05	0.00449171	0.140193	0.126681	0.125886		135.05	0.0090725	0.244119	0.25109	0.243212		135.05	0.00300728	0.344174	0.322062	0.338755		135.05	-0.00575508	0.498002	0.458403	0.439675		135.05	-0.00395697	0.553573	0.560262	0.542601		135.05	0.00378968	0.535281	0.552952	0.471006		135.05	0.00246941	0.349946	0.38419	0.358762		135.05	0.00690359	0.0190549	0.0181153	0.0536523
140.05	0.00450388	0.143695	0.130173	0.133705		140.05	0.00787331	0.250509	0.257529	0.249393		140.05	0.00379015	0.352722	0.331869	0.347349		140.05	-0.00567517	0.510793	0.470631	0.453151		140.05	-0.00251194	0.569237	0.574928	0.555611		140.05	0.00408679	0.543903	0.561698	0.481219		140.05	0.00254786	0.353969	0.390632	0.360928		140.05	0.00680322	0.0191071	0.0180269	0.052915
145.05	0.00406659	0.147387	0.133693	0.133293		145.05	0.00881383	0.256143	0.264605	0.255495		145.05	0.00352701	0.362503	0.341618	0.355946		145.05	-0.00569275	0.523084	0.480555	0.465218		145.05	-0.003298	0.580055	0.588639	0.566087		145.05	0.00495148	0.549897	0.562933	0.489171		145.05	0.00340301	0.358893	0.397205	0.361945		145.05	0.00741529	0.0192199	0.0193132	0.0545934
150.05	0.0048182	0.150427	0.13725	0.133209		150.05	0.00839971	0.261554	0.27052	0.263512		150.05	0.00381106	0.370073	0.348679	0.363798		150.05	-0.00621067	0.53431	0.489998	0.478848		150.05	-0.00331506	0.592182	0.603363	0.576519		150.05	0.00695872	0.55541	0.571459	0.495794		150.05	0.00361478	0.362655	0.405078	0.364167		150.05	0.0080427	0.0190063	0.01946	0.0547912
155.05	0.00410594	0.154294	0.141632	0.135277		155.05	0.00904424	0.267821	0.277169	0.269413		155.05	0.00404438	0.378407	0.357665	0.37251		155.05	-0.00533706	0.544416	0.498005	0.490141		155.05	-0.00166123	0.604341	0.616439	0.587149		155.05	0.00786635	0.558869	0.574989	0.503646		155.05	0.00322887	0.367007	0.399703	0.366146		155.05	0.00785889	0.0199055	0.0187483	0.0549546
160.05	0.00427716	0.157842	0.144792	0.137827		160.05	0.00940033	0.274431	0.283505	0.273942		160.05	0.00454327	0.388196	0.365883	0.380542		160.05	-0.00579243	0.552225	0.509162	0.503953		160.05	-0.00227423	0.61567	0.630636	0.597448		160.05	0.00803194	0.562087	0.579774	0.511375		160.05	0.00291896	0.372646	0.405261	0.367645		160.05	0.00910152	0.019792	0.0197622	0.0560817
165.05	0.0045107	0.160504	0.14919	0.14043		165.05	0.00836559	0.280424	0.2894	0.279941		165.05	0.0070308	0.396855	0.374197	0.388504		165.05	-0.00390684	0.558103	0.519749	0.515216		165.05	-0.00194769	0.626555	0.644648	0.607668		165.05	0.00938279	0.56548	0.583916	0.519854		165.05	0.00453333	0.373695	0.411452	0.369777		165.05	0.00746179	0.0194136	0.0196801	0.0571037
170.05	0.0051541	0.164848	0.152358	0.142978		170.05	0.00917343	0.285167	0.294977	0.285483		170.05	0.00561441	0.40567	0.382937	0.396404		170.05	-0.00534463	0.56382	0.529575	0.526297		170.05	-0.00353228	0.637827	0.656968	0.6156		170.05	0.0100883	0.568041	0.588638	0.527864		170.05	0.0049614	0.376879	0.416396	0.371374		170.05	0.00664513	0.019702	0.0198841	0.0577953
175.05	0.00441752	0.16822	0.155737	0.145851		175.05	0.0104487	0.291035	0.301808	0.292268		175.05	0.00528769	0.413272	0.391768	0.404385		175.05	-0.00553759	0.571459	0.540134	0.538123		175.05	-0.00211094	0.670351	0.665783	0.622927		175.05	0.0112893	0.570788	0.592651	0.533351		175.05	0.00557135	0.38043	0.421729	0.373032		175.05	0.00589518	0.0199025	0.0199405	0.056948
180.05	0.00450168	0.171414	0.160023	0.148594		180.05	0.0106892	0.295634	0.307188	0.298252		180.05	0.00706345	0.421986	0.400289	0.41236		180.05	-0.00409044	0.576353	0.548144	0.549895		180.05	-0.00222241	0.6578	0.677613	0.630421		180.05	0.0123499	0.574324	0.596878	0.539926		180.05	0.00587383	0.38457	0.426334	0.374685		180.05	0.00673667	0.0198716	0.0199076	0.0568448
185.05	0.00416004	0.175278	0.162703	0.150897		185.05	0.0100692	0.300929	0.312119	0.304363		185.05	0.00450388	0.430569	0.408592	0.420998		185.05	-0.00464833	0.579518	0.5576	0.562962		185.05	-0.00225249	0.666607	0.687308	0.640407		185.05	0.0132149	0.57536	0.601384	0.546482		185.05	0.0060994	0.388615	0.427638	0.376302		185.05	0.00749421	0.0194565	0.0211927	0.0582988
190.05	0.00502461	0.178557	0.165763	0.154637		190.05	0.00936497	0.307177	0.318177	0.309314		190.05	0.00559542	0.437562	0.417586	0.428877		190.05	-0.00334352	0.583054	0.564501	0.574477		190.05	-0.00173467	0.676152	0.698392	0.647785		190.05	0.0136589	0.577556	0.604814	0.553842		190.05	0.00537136	0.393008	0.428942	0.378682		190.05	0.00782615	0.0200715	0.02122	0.0590162
195.05	0.00432124	0.18148	0.168916	0.157931		195.05	0.00953883	0.312723	0.32354	0.314477		195.05	0.00564228	0.445901	0.424492	0.436955		195.05	-0.00441819	0.586085	0.572029	0.586228		195.05	-0.00274552	0.685131	0.70739	0.654265		195.05	0.0144685	0.578358	0.606851	0.559018		195.05	0.00625986	0.395867	0.430246	0.37938		195.05	0.00736663	0.0199304	0.0217865	0.0593365
200.05	0.00483715	0.185338	0.171884	0.161692		200.05	0.0100874	0.318316	0.328818	0.321011		200.05	0.00718529	0.45388	0.43274	0.444382		200.05	-0.00466851	0.59225	0.581563	0.597056		200.05	-0.000411858	0.695376	0.719063	0.662406		200.05	0.017068	0.579245	0.608079	0.565893		200.05	0.00715802	0.399562	0.43155	0.380763		200.05	0.00758058	0.0199565	0.0205784	0.0595633
205.05	0.00426984	0.189659	0.175953	0.164297		205.05	0.0103196	0.323582	0.334604	0.326522		205.05	0.00681492	0.461629	0.441269	0.452708		205.05	-0.00400704	0.597826	0.588458	0.60893		205.05	0.000408828	0.701679	0.724478	0.66774		205.05	0.0162136	0.580366	0.609876	0.572038		205.05	0.00655181	0.404256	0.432854	0.380703		205.05	0.00813128	0.0201536	0.0204758	0.0595499
210.05	0.00467149	0.191785	0.178882	0.16882		210.05	0.00982807	0.328179	0.340575	0.331831		210.05	0.00619503	0.470105	0.448913	0.460722		210.05	-0.00417187	0.60435	0.597149	0.619838		210.05	-0.000592953	0.710623	0.732404	0.674085		210.05	0.0179823	0.582156	0.612051	0.576292		210.05	0.00699171	0.406341	0.434158	0.382084		210.05	0.00829426	0.0211726	0.0212107	0.0603744
215.05	0.00471022	0.195197	0.181692	0.1713		215.05	0.00969466	0.333389	0.34659	0.337945		215.05	0.00583093	0.476518	0.456888	0.46739		215.05	-0.00559938	0.609367	0.603588	0.630418		215.05	-0.00221247	0.717269	0.740291	0.679084		215.05	0.0185214	0.582081	0.612436	0.581309		215.05	0.00817003	0.410932	0.435462	0.383936		215.05	0.00808903	0.0206896	0.0213934	0.0596106
220.05	0.00460257	0.198701	0.185771	0.175146		220.05	0.00920146	0.339902	0.351885	0.342959		220.05	0.00654697	0.484463	0.463806	0.474954		220.05	-0.00416715	0.613611	0.610335	0.642254		220.05	-0.000693914	0.724585	0.749721	0.686529		220.05	0.0190409	0.583739	0.61399	0.585337		220.05	0.00654681	0.414099	0.436766	0.385114		220.05	0.00902535	0.0206295	0.0221265	0.0597811
225.05	0.00537008	0.201676	0.188586	0.178391		225.05	0.00920172	0.344656	0.357897	0.349359		225.05	0.00663517	0.49173	0.471634	0.482245		225.05	-0.00484308	0.620334	0.617969	0.650389		225.05	-0.00164839	0.728977	0.757315	0.692228		225.05	0.0200532	0.58503	0.615079	0.590326		225.05	0.00884593	0.416788	0.43807	0.385505		225.05	0.012573	0.0210915	0.0220081	0.0607566
230.05	0.00446833	0.204784	0.191771	0.182005		230.05	0.00855399	0.348781	0.363501	0.355319		230.05	0.00736434	0.499854	0.478624	0.490777		230.05	-0.00607561	0.623942	0.625422	0.663323		230.05	-0.000850298	0.737455	0.761277	0.695444		230.05	0.0208745	0.585975	0.616079	0.594675		230.05	0.0104913	0.422428	0.439374	0.387936		230.05	0.0095935	0.0210409	0.0226299	0.0613281
235.05	0.00510394	0.207421	0.194992	0.18372		235.05	0.00918966	0.353128	0.369738	0.359825		235.05	0.0082154	0.507598	0.487295	0.496085		235.05	-0.00518249	0.628162	0.631176	0.673538		235.05	-0.0010873	0.744582	0.768133	0.701013		235.05	0.023003	0.586301	0.617766	0.597304		235.05	0.00903793	0.426262	0.440678	0.387926		235.05	0.00998154	0.0207688	0.0232541	0.0612575
240.05	0.00474777	0.211289	0.198418	0.187003		240.05	0.00958967	0.357641	0.374769	0.365681		240.05	0.0062184	0.514165	0.494145	0.503331		240.05	-0.00474631	0.633809	0.640225	0.682726		240.05	-0.00117033	0.745312	0.772567	0.70703		240.05	0.0235301	0.586241	0.619473	0.602701		240.05	0.00910879	0.428498	0.441982	0.389124		240.05	0.0105441	0.0212115	0.0233943	0.0621472
245.05	0.00518318	0.214855	0.200758	0.190373		245.05	0.00933146	0.363202	0.379699	0.370057		245.05	0.00540142	0.5223	0.501629	0.511503		245.05	-0.00519769	0.640263	0.645405	0.693716		245.05	-0.000852106	0.752339	0.779252	0.711707		245.05	0.0236747	0.587914	0.61931	0.606337		245.05	0.00980614	0.4316	0.443286	0.390041		245.05	0.0109606	0.0204127	0.0242113	0.0612412
250.05	0.00471945	0.216645	0.203777	0.194235		250.05	0.00924334	0.367922	0.385097	0.374953		250.05	0.00613335	0.528216	0.50906	0.516473		250.05	-0.0052382	0.645211	0.651032	0.702759		250.05	-0.000697119	0.754757	0.783485	0.719447		250.05	0.0240554	0.588392	0.619982	0.610295		250.05	0.0104261	0.43586	0.44459	0.390974		250.05	0.0116787	0.0201281	0.023882	0.0608565
255.05	0.00474479	0.220812	0.206019	0.196386		255.05	0.00997076	0.372958	0.390414	0.379691		255.05	0.00671409	0.536152	0.515762	0.522847		255.05	-0.00422699	0.651123	0.657771	0.71415		255.05	-0.000413875	0.759927	0.78832	0.721491		255.05	0.0255391	0.587624	0.620963	0.612447		255.05	0.0111277	0.439052	0.445894	0.392177		255.05	0.011066	0.0210338	0.0238068	0.0608286
260.05	0.00490733	0.222715	0.208165	0.199339		260.05	0.00936161	0.37711	0.395716	0.38375		260.05	0.00667789	0.542471	0.524238	0.529944		260.05	-0.00237747	0.662008	0.664285	0.721984		260.05	-0.000379633	0.765977	0.793258	0.724576		260.05	0.0264739	0.588941	0.621379	0.616685		260.05	0.0103991	0.443596	0.447198	0.38045		260.05	0.0116692	0.0212749	0.024939	0.0609426
265.05	0.00529751	0.22611	0.211487	0.202154		265.05	0.00902831	0.381578	0.399466	0.388931		265.05	0.00658739	0.548646	0.53121	0.536869		265.05	-0.00319651	0.669157	0.669126	0.732663		265.05	0.000584147	0.76988	0.796837	0.730388		265.05	0.0269546	0.589465	0.622297	0.619708		265.05	0.0151613	0.443731	0.448502	0.382114		265.05	0.0121355	0.0223332	0.024235	0.0612088
270.05	0.00532466	0.229225	0.21411	0.203882		270.05	0.00967613	0.387118	0.404467	0.393254		270.05	0.00668196	0.554742	0.537018	0.542851		270.05	-0.00330437	0.678207	0.674045	0.742167		270.05	8.50437e-05	0.773965	0.802951	0.733247		270.05	0.027401	0.589007	0.622309	0.623602		270.05	0.0146125	0.448029	0.449806	0.391003		270.05	0.0122914	0.0224694	0.0244799	0.062176
275.05	0.00582615	0.231889	0.217678	0.206416		275.05	0.0100273	0.39102	0.409972	0.398		275.05	0.0068794	0.562044	0.543305	0.549227		275.05	-0.00424837	0.683221	0.679323	0.752862		275.05	0.000457802	0.778833	0.805584	0.73789		275.05	0.0280965	0.591196	0.623704	0.625448		275.05	0.0158438	0.450153	0.45111	0.390666		275.05	0.0131682	0.0209687	0.0250477	0.0608162
280.05	0.00578337	0.235667	0.219697	0.208497		280.05	0.00969059	0.395821	0.413937	0.402163		280.05	0.00806902	0.568951	0.549473	0.556798		280.05	-0.00350301	0.69302	0.684194	0.761042		280.05	0.000453941	0.78279	0.809423	0.740038		280.05	0.0290595	0.589887	0.625598	0.628331		280.05	0.0156935	0.45347	0.452414	0.392178		280.05	0.0132175	0.0213453	0.0250796	0.0612813
285.05	0.00585491	0.237859	0.222408	0.210446		285.05	0.0106248	0.400438	0.419315	0.406496		285.05	0.00748905	0.57369	0.556809	0.561742		285.05	-0.00348165	0.697819	0.689031	0.769138		285.05	0.00320243	0.785359	0.81237	0.744881		285.05	0.0303912	0.589724	0.625805	0.631233		285.05	0.0179051	0.456968	0.453718	0.392764		285.05	0.0136531	0.0215975	0.0258441	0.0615787
290.05	0.00514954	0.240162	0.225652	0.213068		290.05	0.0104855	0.404394	0.423747	0.41068		290.05	0.00757902	0.580644	0.563566	0.567739		290.05	-0.00444858	0.705154	0.695483	0.778579		290.05	0.00205143	0.788083	0.817116	0.749439		290.05	0.0313596	0.590249	0.626002	0.633721		290.05	0.0183418	0.460858	0.455022	0.393126		290.05	0.0143461	0.0209557	0.025555	0.0612408
295.05	0.00601716	0.24235	0.228479	0.216099		295.05	0.00903254	0.408606	0.429202	0.415261		295.05	0.00751791	0.586953	0.569039	0.574215		295.05	-0.00288466	0.711277	0.699575	0.787484		295.05	0.00152547	0.792852	0.817999	0.750675		295.05	0.032097	0.590373	0.626139	0.635971		295.05	0.0173419	0.462981	0.456326	0.393626		295.05	0.0134247	0.0210358	0.0253539	0.0622934
300.05	0.00585793	0.245121	0.231051	0.218882		300.05	0.00939922	0.413944	0.433878	0.420272		300.05	0.00873942	0.592858	0.574304	0.580003		300.05	-0.00603895	0.714835	0.704518	0.795706		300.05	0.00177139	0.795234	0.824035	0.753667		300.05	0.0299349	0.590729	0.62843	0.637246		300.05	0.0156598	0.465819	0.45763	0.394149		300.05	0.0166876	0.0212151	0.0265428	0.062862
											K=U/mg protein
										1/T (K)	lnK
										0.0035317	0.354762
										0.00341122	0.992857
										0.0032987	1.30411
										0.00319336	1.70493
										0.00309454	1.87457
										0.00300165	1.87349
										0.00291418	1.43816

## Sheet: Fig2D
		Absorbance (410 nm)						Absorbance (410 nm)						Absorbance (410 nm)						Absorbance (410 nm)						Absorbance (410 nm)						Absorbance (410 nm)						Absorbance (410 nm)					Absorbance (410 nm)
T= 10ºC						T=20ºC						T=30ºC						T=40ºC						T=50ºC						T=55ºC						T=60ºC						T=70ºC						T=80ºC
t(s)	Control	1	2	3		t(s)	Control	1	2	3		t(s)	Control	1	2	3		t(s)	Control	1	2	3		t(s)	Control	1	2	3		t(s)	Control	1	2	3		t(s)	Control	1	2	3		t(s)	Control	1	2	3		t(s)	Control
0.05	-0.000319315	0.0213912	0.0204501	0.00517901		0.05	-0.000319315	0.0269864	0.0139758	0.0047507		0.05	-0.000319315	0.00897645	0.0172329	0.0246608		0.05	-0.000319315	0.0140233	0.0163679	0.011626		0.05	-0.000319315	0.0135404	-0.00254952	0.0188785		0.05	-0.000319315	0.0284598	0.00692784	0.000149854		0.05	-0.000319315	-0.00203004	0.00288172	-0.00201731		0.05	-0.000319315	-0.0093154	-0.0114281	-0.00544777		0.05	-0.000319315
3.05	-0.000489693	0.0307271	0.0269342	0.0102334		3.05	-0.000489693	0.0384713	0.0207395	0.0112085		3.05	-0.000489693	0.0146628	0.0215552	0.0322836		3.05	-0.000489693	0.02248	0.021927	0.0190611		3.05	-0.000489693	0.0199804	0.00391535	0.024054		3.05	-0.000489693	0.0306906	0.00733585	0.00309198		3.05	-0.000489693	-0.00258663	0.0049875	-0.00258302		3.05	-0.000489693	-0.0094107	-0.0125351	-0.00619118		3.05	-0.000489693
6.05	-0.000583078	0.0384509	0.0345171	0.0163168		6.05	-0.000583078	0.0470034	0.0394941	0.0173209		6.05	-0.000583078	0.0228323	0.025634	0.0377937		6.05	-0.000583078	0.0301488	0.0267465	0.0254301		6.05	-0.000583078	0.0258574	0.007319	0.0291448		6.05	-0.000583078	0.0332165	0.0103138	0.00456822		6.05	-0.000583078	-0.00230245	0.00654821	-0.00341529		6.05	-0.000583078	-0.00949753	-0.0116451	-0.00234998		6.05	-0.000583078
9.05	-0.000536802	0.0464319	0.0394663	0.0205927		9.05	-0.000536802	0.0552326	0.0344323	0.0233416		9.05	-0.000536802	0.0317284	0.0302063	0.0442453		9.05	-0.000536802	0.037022	0.032129	0.0303135		9.05	-0.000536802	0.0322903	0.0123201	0.0299883		9.05	-0.000536802	0.0360652	0.0122208	0.00632626		9.05	-0.000536802	-0.0028288	0.00755018	-0.00220274		9.05	-0.000536802	-0.00902895	-0.0123697	-0.000705079		9.05	-0.000536802
12.05	-0.000430322	0.0548036	0.0475328	0.0260537		12.05	-0.000430322	0.0628116	0.0416402	0.0308749		12.05	-0.000430322	0.0372781	0.0346425	0.0509897		12.05	-0.000430322	0.042308	0.0379184	0.0357299		12.05	-0.000430322	0.039137	0.0167591	0.0344261		12.05	-0.000430322	0.0394162	0.0132202	0.00973723		12.05	-0.000430322	-0.00282427	0.00888254	-0.00358276		12.05	-0.000430322	-0.00903407	-0.0107414	-0.00187145		12.05	-0.000430322
15.05	-0.00075542	0.0615881	0.0520921	0.0326686		15.05	-0.00075542	0.0699145	0.0485077	0.0385481		15.05	-0.00075542	0.0441737	0.0405958	0.0563309		15.05	-0.00075542	0.0486358	0.0437905	0.0402782		15.05	-0.00075542	0.0418886	0.0221009	0.0383052		15.05	-0.00075542	0.0421207	0.0150291	0.0113643		15.05	-0.00075542	-0.00259779	0.0105569	-0.00235436		15.05	-0.00075542	-0.00955932	-0.011835	0.000185564		15.05	-0.00075542
18.05	-0.00116078	0.0699698	0.0600691	0.037637		18.05	-0.00116078	0.0782912	0.0678073	0.043759		18.05	-0.00116078	0.0501806	0.0434958	0.0638346		18.05	-0.00116078	0.0545001	0.0485283	0.0478223		18.05	-0.00116078	0.0464287	0.0268429	0.0422373		18.05	-0.00116078	0.0448703	0.0173947	0.0141461		18.05	-0.00116078	-0.00239148	0.0113554	-0.000889049		18.05	-0.00116078	-0.00962875	-0.0120868	0.00122673		18.05	-0.00116078
21.05	-0.00158423	0.0774866	0.0675294	0.0434457		21.05	-0.00158423	0.0864255	0.0634052	0.0495011		21.05	-0.00158423	0.0569832	0.049718	0.0678353		21.05	-0.00158423	0.0621375	0.054879	0.0522906		21.05	-0.00158423	0.0506745	0.0320095	0.0461817		21.05	-0.00158423	0.0468197	0.0190205	0.0169305		21.05	-0.00158423	-0.00379657	0.0131818	-0.00096153		21.05	-0.00158423	-0.0106867	-0.0116792	0.00589852		21.05	-0.00158423
24.05	-0.00104763	0.0854514	0.0717919	0.0489097		24.05	-0.00104763	0.0917572	0.0698166	0.0622461		24.05	-0.00104763	0.0645758	0.0548836	0.0733807		24.05	-0.00104763	0.0710075	0.0600245	0.0614741		24.05	-0.00104763	0.0573754	0.0361253	0.049377		24.05	-0.00104763	0.0506318	0.0215703	0.0208301		24.05	-0.00104763	-0.00202066	0.0136596	-0.00115944		24.05	-0.00104763	-0.0112533	-0.0112331	0.00253041		24.05	-0.00104763
27.05	-0.000957036	0.0938658	0.0804293	0.0544854		27.05	-0.000957036	0.0993549	0.0815831	0.0638528		27.05	-0.000957036	0.0709417	0.0604013	0.0794136		27.05	-0.000957036	0.0780221	0.0654417	0.0634056		27.05	-0.000957036	0.0596556	0.040164	0.0527263		27.05	-0.000957036	0.0529447	0.0228516	0.0221734		27.05	-0.000957036	-0.00224791	0.0150035	0.00186221		27.05	-0.000957036	-0.0109584	-0.0118234	0.00324841		27.05	-0.000957036
30.05	-0.00150752	0.102371	0.0859999	0.060454		30.05	-0.00150752	0.107416	0.0847265	0.0725094		30.05	-0.00150752	0.0785995	0.0661039	0.0853898		30.05	-0.00150752	0.082125	0.0716985	0.0694722		30.05	-0.00150752	0.0644251	0.0444014	0.0550031		30.05	-0.00150752	0.0548093	0.025474	0.0239505		30.05	-0.00150752	-0.00248018	0.0166739	4.03322e-05		30.05	-0.00150752	-0.0109342	-0.0122732	0.00477514		30.05	-0.00150752
33.05	-0.000676598	0.109133	0.092894	0.0675587		33.05	-0.000676598	0.115498	0.0961549	0.0777363		33.05	-0.000676598	0.0871718	0.0721416	0.0919979		33.05	-0.000676598	0.0838332	0.0791097	0.0742286		33.05	-0.000676598	0.0687215	0.0485645	0.0605395		33.05	-0.000676598	0.0577994	0.0266698	0.0264465		33.05	-0.000676598	-0.00272643	0.017888	0.00047563		33.05	-0.000676598	-0.0108131	-0.012511	0.00386486		33.05	-0.000676598
36.05	-0.000785395	0.117195	0.1017	0.0815139		36.05	-0.000785395	0.122787	0.0996565	0.0855547		36.05	-0.000785395	0.0943033	0.0777108	0.0981803		36.05	-0.000785395	0.0901264	0.0833401	0.0805965		36.05	-0.000785395	0.0730265	0.0536466	0.0642011		36.05	-0.000785395	0.0600744	0.0288076	0.028234		36.05	-0.000785395	-0.00251951	0.0186677	0.000616316		36.05	-0.000785395	-0.011171	-0.0130137	0.00430741		36.05	-0.000785395
39.05	-0.0012708	0.125593	0.106114	0.0799012		39.05	-0.0012708	0.130566	0.107138	0.0926028		39.05	-0.0012708	0.102204	0.0860437	0.1041		39.05	-0.0012708	0.0955358	0.0896548	0.0867633		39.05	-0.0012708	0.0777379	0.0580174	0.0661455		39.05	-0.0012708	0.063034	0.0305476	0.0305304		39.05	-0.0012708	-0.00286095	0.0198149	0.00140895		39.05	-0.0012708	-0.0117097	-0.012921	0.00516091		39.05	-0.0012708
42.05	-0.000840842	0.133237	0.126017	0.086695		42.05	-0.000840842	0.138304	0.114772	0.0977002		42.05	-0.000840842	0.108149	0.0925499	0.109887		42.05	-0.000840842	0.10146	0.0961468	0.0933908		42.05	-0.000840842	0.0825454	0.0624426	0.0705558		42.05	-0.000840842	0.0666411	0.0328005	0.0338341		42.05	-0.000840842	-0.0021948	0.0207114	0.0015297		42.05	-0.000840842	-0.0123771	-0.0130197	0.00611201		42.05	-0.000840842
45.05	-0.000557123	0.142296	0.122113	0.0939612		45.05	-0.000557123	0.146717	0.123356	0.10568		45.05	-0.000557123	0.116312	0.0984607	0.11658		45.05	-0.000557123	0.108991	0.103519	0.100561		45.05	-0.000557123	0.0865242	0.0663869	0.0742777		45.05	-0.000557123	0.0691882	0.0345262	0.0356195		45.05	-0.000557123	-0.00220794	0.0218699	0.00194276		45.05	-0.000557123	-0.0122332	-0.0129554	0.00687724		45.05	-0.000557123
48.05	-0.00038884	0.150688	0.129831	0.101306		48.05	-0.00038884	0.154649	0.13225	0.112856		48.05	-0.00038884	0.124369	0.106818	0.123829		48.05	-0.00038884	0.116425	0.110662	0.106446		48.05	-0.00038884	0.09117	0.0707542	0.0778787		48.05	-0.00038884	0.0708324	0.0379568	0.0378255		48.05	-0.00038884	-0.00283549	0.023338	0.00141241		48.05	-0.00038884	-0.011842	-0.0135228	0.00685528		48.05	-0.00038884
51.05	-0.00135318	0.159465	0.138299	0.108998		51.05	-0.00135318	0.162851	0.141144	0.121126		51.05	-0.00135318	0.132598	0.112905	0.131025		51.05	-0.00135318	0.121731	0.117329	0.113807		51.05	-0.00135318	0.0950704	0.0758778	0.0817782		51.05	-0.00135318	0.0738296	0.0383978	0.0399565		51.05	-0.00135318	-0.003298	0.0259582	0.00206462		51.05	-0.00135318	-0.0111228	-0.0140604	0.0085428		51.05	-0.00135318
54.05	-0.000266337	0.167896	0.145374	0.117301		54.05	-0.000266337	0.170552	0.150056	0.12841		54.05	-0.000266337	0.140456	0.121096	0.138158		54.05	-0.000266337	0.128484	0.122831	0.12031		54.05	-0.000266337	0.0987722	0.0802961	0.0856214		54.05	-0.000266337	0.0754442	0.0409946	0.0423988		54.05	-0.000266337	-0.00384311	0.0251313	0.00349421		54.05	-0.000266337	-0.0115308	-0.0138902	0.0091907		54.05	-0.000266337
57.05	-0.00118226	0.17613	0.155238	0.125019		57.05	-0.00118226	0.178328	0.158763	0.137155		57.05	-0.00118226	0.149032	0.132423	0.145021		57.05	-0.00118226	0.134145	0.129983	0.127456		57.05	-0.00118226	0.103322	0.0842342	0.0895861		57.05	-0.00118226	0.078687	0.0428703	0.0456029		57.05	-0.00118226	-0.00359745	0.0268678	0.00248677		57.05	-0.00118226	-0.012076	-0.014313	0.009265		57.05	-0.00118226
60.05	-0.00115056	0.184524	0.162219	0.132636		60.05	-0.00115056	0.187902	0.168651	0.14335		60.05	-0.00115056	0.157505	0.137373	0.151603		60.05	-0.00115056	0.141428	0.137293	0.133257		60.05	-0.00115056	0.107974	0.0890957	0.0936744		60.05	-0.00115056	0.080984	0.0447983	0.0477468		60.05	-0.00115056	-0.00377085	0.0292576	0.00362019		60.05	-0.00115056	-0.0121518	-0.0125903	0.00918366		60.05	-0.00115056
63.05	-0.00152305	0.192312	0.170478	0.141819		63.05	-0.00152305	0.195328	0.177482	0.151762		63.05	-0.00152305	0.167177	0.145754	0.159423		63.05	-0.00152305	0.147625	0.144728	0.139668		63.05	-0.00152305	0.113286	0.0941696	0.0971275		63.05	-0.00152305	0.0844437	0.0474428	0.0499351		63.05	-0.00152305	-0.00311849	0.0303612	0.00395858		63.05	-0.00152305	-0.0129399	-0.0136236	0.010221		63.05	-0.00152305
66.05	-0.00140184	0.20208	0.179133	0.150579		66.05	-0.00140184	0.203723	0.187197	0.160114		66.05	-0.00140184	0.175605	0.154516	0.166033		66.05	-0.00140184	0.155207	0.151607	0.146572		66.05	-0.00140184	0.117329	0.0982144	0.101315		66.05	-0.00140184	0.0869281	0.048688	0.0528278		66.05	-0.00140184	-0.00397569	0.0315963	0.00529932		66.05	-0.00140184	-0.0126348	-0.0118556	0.0108319		66.05	-0.00140184
69.05	-0.00135318	0.209626	0.187405	0.159048		69.05	-0.00135318	0.212391	0.196227	0.168284		69.05	-0.00135318	0.182161	0.163976	0.173334		69.05	-0.00135318	0.163002	0.159815	0.155705		69.05	-0.00135318	0.122017	0.102467	0.105879		69.05	-0.00135318	0.0887482	0.0510314	0.0544378		69.05	-0.00135318	-0.00347297	0.0323712	0.00503409		69.05	-0.00135318	-0.0122732	-0.0117567	0.0118794		69.05	-0.00135318
72.05	-0.00150091	0.218735	0.195822	0.168657		72.05	-0.00150091	0.220732	0.206197	0.17637		72.05	-0.00150091	0.190533	0.171664	0.181972		72.05	-0.00150091	0.169586	0.167959	0.163112		72.05	-0.00150091	0.126618	0.106819	0.109376		72.05	-0.00150091	0.0914244	0.0528345	0.056603		72.05	-0.00150091	-0.00304807	0.0341446	0.00579916		72.05	-0.00150091	-0.0129612	-0.0142344	0.0126912		72.05	-0.00150091
75.05	-0.00220799	0.227177	0.205702	0.178661		75.05	-0.00220799	0.228891	0.216365	0.185001		75.05	-0.00220799	0.19892	0.181615	0.189004		75.05	-0.00220799	0.176793	0.174262	0.170501		75.05	-0.00220799	0.130468	0.112531	0.113221		75.05	-0.00220799	0.0935999	0.054698	0.0586953		75.05	-0.00220799	-0.00328464	0.0362444	0.00667079		75.05	-0.00220799	-0.0131596	-0.0141746	0.0136307		75.05	-0.00220799
78.05	-0.00186248	0.235232	0.214173	0.187701		78.05	-0.00186248	0.238105	0.22683	0.193554		78.05	-0.00186248	0.207252	0.190164	0.196281		78.05	-0.00186248	0.183555	0.181564	0.178077		78.05	-0.00186248	0.1353	0.117561	0.117441		78.05	-0.00186248	0.0958213	0.0567061	0.0611851		78.05	-0.00186248	-0.0028612	0.0381405	0.00666916		78.05	-0.00186248	-0.0135584	-0.0142182	0.0863086		78.05	-0.00186248
81.05	-0.00200886	0.243921	0.220497	0.196352		81.05	-0.00200886	0.247154	0.237066	0.200777		81.05	-0.00200886	0.215638	0.20032	0.204646		81.05	-0.00200886	0.191103	0.190857	0.185431		81.05	-0.00200886	0.139746	0.121462	0.121063		81.05	-0.00200886	0.0987252	0.0586227	0.06349		81.05	-0.00200886	-0.00373298	0.038821	0.00759678		81.05	-0.00200886	-0.0138509	-0.0141598	0.0121343		81.05	-0.00200886
84.05	-0.00202046	0.252061	0.232768	0.206602		84.05	-0.00202046	0.254716	0.248221	0.209468		84.05	-0.00202046	0.22322	0.20884	0.211185		84.05	-0.00202046	0.197893	0.197466	0.195191		84.05	-0.00202046	0.143625	0.126321	0.125589		84.05	-0.00202046	0.100787	0.0614022	0.0655497		84.05	-0.00202046	-0.00441188	0.0401257	0.00870509		84.05	-0.00202046	-0.013766	-0.0147897	0.0137591		84.05	-0.00202046
87.05	-0.00199417	0.260556	0.244359	0.216559		87.05	-0.00199417	0.26345	0.258663	0.217721		87.05	-0.00199417	0.231168	0.217559	0.218972		87.05	-0.00199417	0.205399	0.207526	0.19944		87.05	-0.00199417	0.148899	0.131374	0.129253		87.05	-0.00199417	0.103193	0.0636461	0.0679224		87.05	-0.00199417	-0.00399944	0.041449	0.00885338		87.05	-0.00199417	-0.0141454	-0.0143281	0.014873		87.05	-0.00199417
90.05	-0.00162384	0.26844	0.247875	0.225855		90.05	-0.00162384	0.270585	0.268386	0.226881		90.05	-0.00162384	0.239641	0.226825	0.226877		90.05	-0.00162384	0.212022	0.21486	0.209		90.05	-0.00162384	0.153521	0.135997	0.133085		90.05	-0.00162384	0.105872	0.0654161	0.0710302		90.05	-0.00162384	-0.00424745	0.0418175	0.00923004		90.05	-0.00162384	-0.0137451	-0.0151222	0.0147544		90.05	-0.00162384
93.05	-0.0018481	0.275955	0.257232	0.235111		93.05	-0.0018481	0.279136	0.278248	0.236168		93.05	-0.0018481	0.247508	0.236742	0.233675		93.05	-0.0018481	0.219007	0.222979	0.218048		93.05	-0.0018481	0.158052	0.140766	0.137227		93.05	-0.0018481	0.108218	0.067036	0.0723288		93.05	-0.0018481	-0.00371265	0.0446073	0.0103328		93.05	-0.0018481	-0.0142429	-0.0144693	0.0162947		93.05	-0.0018481
96.05	-0.00185047	0.284222	0.267862	0.244979		96.05	-0.00185047	0.287467	0.28859	0.244332		96.05	-0.00185047	0.255895	0.245344	0.241882		96.05	-0.00185047	0.225607	0.230998	0.226041		96.05	-0.00185047	0.162146	0.144967	0.140604		96.05	-0.00185047	0.11053	0.0688972	0.0748133		96.05	-0.00185047	-0.00366573	0.0465873	0.0105223		96.05	-0.00185047	-0.0142093	-0.0151298	0.0162434		96.05	-0.00185047
99.05	-0.00181717	0.292768	0.274273	0.255043		99.05	-0.00181717	0.294956	0.299192	0.252741		99.05	-0.00181717	0.263143	0.254766	0.249957		99.05	-0.00181717	0.233315	0.238507	0.232355		99.05	-0.00181717	0.165997	0.150392	0.145479		99.05	-0.00181717	0.112385	0.0715511	0.0772474		99.05	-0.00181717	-0.00313278	0.0480029	0.0110776		99.05	-0.00181717	-0.0141749	-0.0146929	0.0171584		99.05	-0.00181717
102.05	-0.0020692	0.299565	0.282142	0.264886		102.05	-0.0020692	0.303799	0.309749	0.262179		102.05	-0.0020692	0.269088	0.262979	0.256743		102.05	-0.0020692	0.23989	0.247518	0.239946		102.05	-0.0020692	0.1715	0.154605	0.149016		102.05	-0.0020692	0.114377	0.0728779	0.080054		102.05	-0.0020692	-0.00325037	0.048325	0.0120977		102.05	-0.0020692	-0.0138088	-0.0150766	0.0177741		102.05	-0.0020692
105.05	-0.00132665	0.30731	0.289744	0.273806		105.05	-0.00132665	0.311718	0.319923	0.270542		105.05	-0.00132665	0.276371	0.272003	0.263093		105.05	-0.00132665	0.246881	0.255803	0.247479		105.05	-0.00132665	0.176035	0.158991	0.15317		105.05	-0.00132665	0.117063	0.0751885	0.082409		105.05	-0.00132665	-0.00316784	0.0505333	0.0124909		105.05	-0.00132665	-0.0144613	-0.0145619	0.0196398		105.05	-0.00132665
108.05	-0.0024684	0.314349	0.29746	0.282499		108.05	-0.0024684	0.320089	0.329979	0.279996		108.05	-0.0024684	0.28392	0.279929	0.270423		108.05	-0.0024684	0.25336	0.263982	0.254535		108.05	-0.0024684	0.181209	0.163291	0.157151		108.05	-0.0024684	0.119818	0.0772688	0.084576		108.05	-0.0024684	-0.00309439	0.0509537	0.0128456		108.05	-0.0024684	-0.0137836	-0.0143782	0.0218853		108.05	-0.0024684
111.05	-0.00250572	0.321921	0.308485	0.293062		111.05	-0.00250572	0.327036	0.340481	0.29155		111.05	-0.00250572	0.291004	0.289346	0.279543		111.05	-0.00250572	0.261025	0.272369	0.263077		111.05	-0.00250572	0.185851	0.168611	0.161268		111.05	-0.00250572	0.12271	0.0793098	0.0879821		111.05	-0.00250572	-0.00348581	0.0526591	0.0133161		111.05	-0.00250572	-0.0144018	-0.0141413	0.0215275		111.05	-0.00250572
114.05	-0.00239395	0.328741	0.314769	0.301956		114.05	-0.00239395	0.333779	0.351271	0.30086		114.05	-0.00239395	0.29756	0.296925	0.286821		114.05	-0.00239395	0.267201	0.279768	0.270191		114.05	-0.00239395	0.190032	0.173915	0.164829		114.05	-0.00239395	0.124151	0.0799733	0.0898886		114.05	-0.00239395	-0.0026051	0.053829	0.013758		114.05	-0.00239395	-0.0146693	-0.0133629	0.0219343		114.05	-0.00239395
117.05	-0.00215818	0.335768	0.322828	0.310946		117.05	-0.00215818	0.342633	0.362508	0.311007		117.05	-0.00215818	0.304817	0.305626	0.294116		117.05	-0.00215818	0.273471	0.288764	0.277557		117.05	-0.00215818	0.195968	0.179302	0.168473		117.05	-0.00215818	0.127315	0.0830136	0.0911595		117.05	-0.00215818	-0.00290266	0.0550988	0.0153219		117.05	-0.00215818	-0.0145484	-0.0137486	0.0223299		117.05	-0.00215818
120.05	-0.00237433	0.342309	0.330889	0.319657		120.05	-0.00237433	0.350093	0.37224	0.320108		120.05	-0.00237433	0.310787	0.313395	0.299813		120.05	-0.00237433	0.280514	0.296037	0.285551		120.05	-0.00237433	0.200086	0.184427	0.172328		120.05	-0.00237433	0.128451	0.0843644	0.0925958		120.05	-0.00237433	-0.00262929	0.0559607	0.0162588		120.05	-0.00237433	-0.0141691	-0.0146404	0.022694		120.05	-0.00237433
123.05	-0.00233819	0.349035	0.339133	0.328991		123.05	-0.00233819	0.357922	0.381752	0.32922		123.05	-0.00233819	0.317629	0.322819	0.306961		123.05	-0.00233819	0.287093	0.304682	0.292568		123.05	-0.00233819	0.205442	0.189117	0.176707		123.05	-0.00233819	0.13122	0.086867	0.0948472		123.05	-0.00233819	-0.00303383	0.0576044	0.0155849		123.05	-0.00233819	-0.0146752	-0.0153564	0.0241209		123.05	-0.00233819
126.05	-0.00278405	0.356128	0.347352	0.337785		126.05	-0.00278405	0.365871	0.391736	0.339057		126.05	-0.00278405	0.323091	0.331175	0.313755		126.05	-0.00278405	0.294317	0.311502	0.299895		126.05	-0.00278405	0.209892	0.194211	0.180742		126.05	-0.00278405	0.133426	0.0889105	0.097352		126.05	-0.00278405	-0.00280277	0.0583861	0.016424		126.05	-0.00278405	-0.0139485	-0.0152614	0.0250477		126.05	-0.00278405
129.05	-0.002818	0.362665	0.355275	0.346217		129.05	-0.002818	0.374527	0.40235	0.348911		129.05	-0.002818	0.32971	0.33906	0.320031		129.05	-0.002818	0.30027	0.319191	0.306882		129.05	-0.002818	0.21462	0.199758	0.185917		129.05	-0.002818	0.13622	0.0907477	0.0996786		129.05	-0.002818	-0.00334532	0.0598843	0.0175059		129.05	-0.002818	-0.0142956	-0.0153809	0.0270159		129.05	-0.002818
132.05	-0.00244497	0.369252	0.363255	0.354727		132.05	-0.00244497	0.379672	0.412654	0.357287		132.05	-0.00244497	0.335495	0.348523	0.327988		132.05	-0.00244497	0.307684	0.327621	0.315058		132.05	-0.00244497	0.219855	0.20496	0.190137		132.05	-0.00244497	0.139893	0.092149	0.101826		132.05	-0.00244497	-0.00326779	0.0607584	0.0181448		132.05	-0.00244497	-0.0146177	-0.0153002	0.0270687		132.05	-0.00244497
135.05	-0.00308482	0.37512	0.370927	0.363061		135.05	-0.00308482	0.386555	0.422621	0.367074		135.05	-0.00308482	0.34095	0.354811	0.335496		135.05	-0.00308482	0.312941	0.33514	0.320375		135.05	-0.00308482	0.224952	0.20944	0.194737		135.05	-0.00308482	0.141458	0.0936792	0.104098		135.05	-0.00308482	-0.00288522	0.0625209	0.0185907		135.05	-0.00308482	-0.0148456	-0.0155791	0.0279421		135.05	-0.00308482
138.05	-0.00226727	0.381161	0.379758	0.371018		138.05	-0.00226727	0.393137	0.432291	0.375428		138.05	-0.00226727	0.346466	0.362686	0.343077		138.05	-0.00226727	0.319374	0.343114	0.328034		138.05	-0.00226727	0.229598	0.214797	0.198316		138.05	-0.00226727	0.1439	0.0962838	0.106808		138.05	-0.00226727	-0.00272196	0.0641482	0.0188617		138.05	-0.00226727	-0.0145145	-0.0158089	0.0283273		138.05	-0.00226727
141.05	-0.00223658	0.387034	0.386402	0.378478		141.05	-0.00223658	0.40015	0.441946	0.384658		141.05	-0.00223658	0.351252	0.370378	0.34943		141.05	-0.00223658	0.324302	0.350214	0.335143		141.05	-0.00223658	0.233901	0.221016	0.201812		141.05	-0.00223658	0.144489	0.0983156	0.109269		141.05	-0.00223658	-0.00309228	0.0652713	0.0194069		141.05	-0.00223658	-0.0152813	-0.015396	0.0298041		141.05	-0.00223658
144.05	-0.00258884	0.392153	0.393567	0.386781		144.05	-0.00258884	0.40652	0.451296	0.393711		144.05	-0.00258884	0.35763	0.377507	0.355475		144.05	-0.00258884	0.33204	0.357834	0.340989		144.05	-0.00258884	0.238761	0.225782	0.206425		144.05	-0.00258884	0.147853	0.0991995	0.111492		144.05	-0.00258884	-0.0030383	0.0678317	0.0202763		144.05	-0.00258884	-0.0148131	-0.0155412	0.0300452		144.05	-0.00258884
147.05	-0.00289839	0.398251	0.400358	0.395777		147.05	-0.00289839	0.413556	0.460931	0.402608		147.05	-0.00289839	0.362887	0.385551	0.362877		147.05	-0.00289839	0.338245	0.365591	0.347345		147.05	-0.00289839	0.244369	0.232241	0.21072		147.05	-0.00289839	0.149644	0.101299	0.11263		147.05	-0.00289839	-0.00283981	0.0693511	0.0215305		147.05	-0.00289839	-0.0148091	-0.01562	0.0309343		147.05	-0.00289839
150.05	-0.00322694	0.403859	0.408383	0.403891		150.05	-0.00322694	0.418863	0.469148	0.41207		150.05	-0.00322694	0.367684	0.393235	0.369731		150.05	-0.00322694	0.343569	0.371563	0.355041		150.05	-0.00322694	0.249354	0.236946	0.215034		150.05	-0.00322694	0.152548	0.103807	0.114521		150.05	-0.00322694	-0.00325911	0.0716951	0.0221636		150.05	-0.00322694	-0.0156059	-0.014949	0.0320874		150.05	-0.00322694
153.05	-0.00305316	0.408841	0.415714	0.411166		153.05	-0.00305316	0.425346	0.478929	0.423269		153.05	-0.00305316	0.372688	0.401302	0.375508		153.05	-0.00305316	0.349864	0.378786	0.360514		153.05	-0.00305316	0.254254	0.241698	0.218529		153.05	-0.00305316	0.155092	0.104948	0.11752		153.05	-0.00305316	-0.00301069	0.0715726	0.0227198		153.05	-0.00305316	-0.0151544	-0.0154436	0.0331052		153.05	-0.00305316
156.05	-0.00276111	0.414722	0.422543	0.41878		156.05	-0.00276111	0.431419	0.487439	0.432046		156.05	-0.00276111	0.377345	0.407993	0.381517		156.05	-0.00276111	0.35494	0.386927	0.366255		156.05	-0.00276111	0.259767	0.247407	0.222682		156.05	-0.00276111	0.156518	0.107057	0.119822		156.05	-0.00276111	-0.00312965	0.0736332	0.0237144		156.05	-0.00276111	-0.0154434	-0.0150272	0.034147		156.05	-0.00276111
159.05	-0.00297403	0.419224	0.429851	0.425826		159.05	-0.00297403	0.438269	0.497182	0.440453		159.05	-0.00297403	0.381536	0.413563	0.388707		159.05	-0.00297403	0.360907	0.39238	0.372597		159.05	-0.00297403	0.26412	0.253378	0.227078		159.05	-0.00297403	0.15883	0.108731	0.122192		159.05	-0.00297403	-0.00283405	0.0745143	0.0244997		159.05	-0.00297403	-0.0153131	-0.015157	0.0353407		159.05	-0.00297403
162.05	-0.00226748	0.424349	0.435734	0.43361		162.05	-0.00226748	0.443941	0.506467	0.449808		162.05	-0.00226748	0.387457	0.420133	0.394765		162.05	-0.00226748	0.366039	0.400565	0.379499		162.05	-0.00226748	0.269075	0.257626	0.231556		162.05	-0.00226748	0.159986	0.110613	0.123985		162.05	-0.00226748	-0.00260716	0.0756189	0.0247989		162.05	-0.00226748	-0.0155421	-0.0155141	0.0357291		162.05	-0.00226748
165.05	-0.00283693	0.429302	0.445682	0.439816		165.05	-0.00283693	0.449379	0.515305	0.458297		165.05	-0.00283693	0.391285	0.428029	0.400206		165.05	-0.00283693	0.370657	0.407349	0.384699		165.05	-0.00283693	0.274095	0.26369	0.236189		165.05	-0.00283693	0.162878	0.112653	0.125876		165.05	-0.00283693	-0.00290096	0.0765119	0.0252978		165.05	-0.00283693	-0.0162309	-0.0158561	0.0364091		165.05	-0.00283693
168.05	-0.00229967	0.434175	0.449057	0.447743		168.05	-0.00229967	0.45519	0.52389	0.467064		168.05	-0.00229967	0.395304	0.43338	0.405433		168.05	-0.00229967	0.377393	0.414317	0.389718		168.05	-0.00229967	0.279207	0.269247	0.240311		168.05	-0.00229967	0.164449	0.115295	0.128273		168.05	-0.00229967	-0.00263119	0.0778914	0.0267289		168.05	-0.00229967	-0.0157595	-0.0157901	0.0381019		168.05	-0.00229967
171.05	-0.00310035	0.439087	0.45631	0.453989		171.05	-0.00310035	0.461107	0.532452	0.477597		171.05	-0.00310035	0.399669	0.440883	0.410615		171.05	-0.00310035	0.382298	0.421341	0.395536		171.05	-0.00310035	0.284052	0.274537	0.244307		171.05	-0.00310035	0.167325	0.116344	0.130507		171.05	-0.00310035	-0.00285966	0.0784421	0.0272012		171.05	-0.00310035	-0.0156446	-0.01583	0.0391275		171.05	-0.00310035
174.05	-0.00321116	0.443179	0.462375	0.460081		174.05	-0.00321116	0.466708	0.541632	0.485481		174.05	-0.00321116	0.403172	0.445673	0.417126		174.05	-0.00321116	0.388237	0.427406	0.400763		174.05	-0.00321116	0.288936	0.280142	0.248398		174.05	-0.00321116	0.169579	0.117076	0.133774		174.05	-0.00321116	-0.00221438	0.079876	0.028494		174.05	-0.00321116	-0.0153523	-0.0158892	0.0408656		174.05	-0.00321116
177.05	-0.00351031	0.448797	0.467787	0.466203		177.05	-0.00351031	0.47224	0.549042	0.493526		177.05	-0.00351031	0.405575	0.452574	0.423972		177.05	-0.00351031	0.391932	0.432821	0.406705		177.05	-0.00351031	0.293718	0.285643	0.252845		177.05	-0.00351031	0.1723	0.118525	0.135316		177.05	-0.00351031	-0.00334198	0.0818989	0.0278986		177.05	-0.00351031	-0.015226	-0.0158151	0.0411487		177.05	-0.00351031
180.05	-0.00309855	0.45311	0.474238	0.473088		180.05	-0.00309855	0.477966	0.556781	0.503553		180.05	-0.00309855	0.410521	0.458775	0.42786		180.05	-0.00309855	0.398144	0.439137	0.411522		180.05	-0.00309855	0.298526	0.290835	0.256173		180.05	-0.00309855	0.175223	0.119867	0.136691		180.05	-0.00309855	-0.00307202	0.0820399	0.0288985		180.05	-0.00309855	-0.0153768	-0.01578	0.0418899		180.05	-0.00309855
						VpTLH activity was assayed by triplicate at each temperature. Data mean average (n=3)
						T(ºC)	Residual activity (%)	SD
						10	97.8053	5.99358
						20	100	6.16778
						30	90.6238	6.92237
						40	82.5896	1.06854
						50	54.0876	5.61656
						55	29.1885	3.94436
						60	6.92534	8.64479
						70	0	0
						80	0	0
[truncated: 3 more columns]
