# Supplementary material for: Biochemical characterization and inhibition of thermolabile hemolysin from Vibrio parahaemolyticus by phenolic compounds
Source: PeerJ. 2021 Jan 6;9:e10506. doi: 10.7717/peerj.10506 (PMC7796666; doi:10.7717/peerj.10506)
Supplement: File S5 [file peerj-09-10506-s005.xlsx]

## Sheet: Fig4_Phenolic Ac.
															Residual activity (%)
	Absorbance at 410 nm
	VpTLH w/o inh	30 mM				100 mM							Gallic Acid (GA)		Chlorogenic Acid (CL)		Protocatechuic acid (PR)		Vanillic acid (VA)
time (sec)	Nat	Proto	Cloro	Galic	Vani	Proto	Cloro	Galic	Vani			Control (-)	30 µM	100 µM	30 µM	100 µM	30 µM	100 µM	30 µM	100 µM
0.05	0.114528	0.115943	0.162581	0.121097	0.128821	0.0699774	0.191439	-0.0439721	0.0955653		1	103.526	85.5219	84.2772	102.564	90.9605	83.6307	82.5917	78.3778	72.7937
5.05	0.281331	0.207189	0.28947	0.233922	0.223338	0.114399	0.254349	0.000547294	0.162334		2	111.769	88.0875	79.9484	108.91	82.7741	81.54	78.3494	74.352	71.3378
10.05	0.418742	0.301338	0.404034	0.333064	0.29173	0.148929	0.322138	0.0755603	0.200677		3	84.7042	80.3906	78.849	83.1563	85.6848	85.1361	77.272	73.3296	76.4334
15.05	0.547559	0.397077	0.508523	0.450277	0.367054	0.200592	0.379216	0.06245	0.263717		SD	13.8729	3.91911	2.86975	13.4177	4.14976	1.80598	2.81235	2.66887	2.62462
20.05	0.66217	0.481075	0.589814	0.540767	0.44756	0.286017	0.42908	0.138801	0.333366			100	84.6667	81.0249	98.2103	86.4731	83.4356	79.4044	75.3531	73.5217
25.05	0.770978	0.592358	0.714704	0.620557	0.515761	0.29404	0.49212	0.18883	0.393144
30.05	0.861347	0.652691	0.811824	0.731023	0.603492	0.365545	0.55058	0.268115	0.439615
35.05	0.955563	0.696219	0.86505	0.758058	0.655202	0.411522	0.633509	0.361518	0.485478
40.05	1.03614	0.748483	0.937756	0.828127	0.686399	0.470109	0.677565	0.39504	0.5427
45.05	1.09395	0.822399	0.995661	0.866743	0.736513	0.529387	0.732713	0.456321	0.590504
50.05	1.16866	0.868222	1.0544	0.93779	0.792963	0.620369	0.79696	0.509896	0.628487
55.05	1.21838	0.919676	1.10549	0.983693	0.845922	0.673943	0.860659	0.55224	0.689576
60.05	1.26058	0.975488	1.18177	1.03345	0.898719	0.731519	0.920055	0.614842	0.75166
65.05	1.30356	1.02215	1.23436	1.07768	0.922748	0.796126	0.986984	0.667209	0.78765
70.05	1.34688	1.06814	1.28336	1.11831	0.959768	0.844189	1.05449	0.734802	0.83726
75.05	1.38567	1.1078	1.33071	1.15648	0.998729	0.908937	1.11365	0.781327	0.890262
80.05	1.40849	1.14094	1.38986	1.1919	1.03014	0.945121	1.1796	0.84359	0.954956
85.05	1.43564	1.17396	1.42733	1.22076	1.06377	0.996868	1.24312	0.908017	1.00367
90.05	1.45312	1.2104	1.46597	1.24194	1.08887	1.05012	1.30724	0.960266	1.04978
95.05	1.46986	1.23436	1.48851	1.27577	1.11618	1.11314	1.37865	1.03377	1.11248
100.05	1.49323	1.27888	1.52407	1.30319	1.14866	1.17037	1.44317	1.06625	1.15647
105.05	1.50541	1.27933	1.56896	1.31977	1.1596	1.22069	1.5035	1.12902	1.20939
110.05	1.5272	1.29942	1.58096	1.33958	1.18345	1.2772	1.56576	1.19154	1.25187
115.05	1.53515	1.33824	1.60792	1.34796	1.20544	1.33016	1.63038	1.24235	1.30543
120.05	1.54469	1.3581	1.60921	1.37238	1.22121	1.38449	1.69141	1.30106	1.36083

## Sheet: Fig5_IC50
EGCG mM		0					0.5					1					3					5					7					10					15					20					30
t(s)	1	2	3		t(s)	1	2	3		t(s)	1	2	3		t(s)	1	2	3		t(s)	1	2	3		t(s)	1	2	3		t(s)	1	2	3		t(s)	1	2	3		t(s)	1	2	3		t(s)	1	2	3
0.05	0.035107	0.0686875	0.0389923		0.05	0.035107	0.0389923	0.0623787		0.05	0.0322472	0.0327364	0.0322472		0.05	0.0179284	0.0187975	0.0235266		0.05	0.0215699	0.0197449	0.0377096		0.05	0.0381467	0.0496063	0.0314592		0.05	0.0291808	0.0344478	0.0106967		0	0.00704004	0.0363405	0.0353566		0.05	0.00113095	0.0115054	0.01931		0.05	0.00836646	0.00394105	-0.00144142
5.05	0.0963499	0.127115	0.085733		5.05	0.0963499	0.085733	0.104719		5.05	0.0809497	0.0899656	0.0809497		5.05	0.0549915	0.0467305	0.0575419		5.05	0.0452708	0.0422855	0.0445375		5.05	0.0734695	0.0284064	0.0267045		5.05	0.0209191	0.046618	0.0403521		5.05	0.0190531	0.0274297	0.0356135		5.05	0.0182514	0.025092	0.0384126		5.05	0.0235418	0.0262665	0.0117296
10.05	0.158348	0.18017	0.155432		10.05	0.158348	0.155432	0.131274		10.05	0.123391	0.146477	0.123391		10.05	0.0856171	0.0822924	0.0656821		10.05	0.0722822	0.0522385	0.0553254		10.05	0.0923697	0.0369402	0.0404034		10.05	0.0344914	0.0832689	0.0635364		10.05	0.0355116	0.0411768	0.0659466		10.05	0.0307503	0.0397269	0.0548467		10.05	0.0352651	0.0574637	0.0374351
15.05	0.215877	0.226804	0.178878		15.05	0.215877	0.178878	0.173879		15.05	0.17034	0.194106	0.17034		15.05	0.127276	0.0903774	0.0903961		15.05	0.094967	0.068757	0.0742845		15.05	0.10604	0.051281	0.0600623		15.05	0.0511134	0.0936875	0.0884555		15.05	0.0512729	0.0555027	0.0786647		15.05	0.0385775	0.0598127	0.0690923		15.05	0.0615925	0.0482113	0.0455659
20.05	0.279736	0.299041	0.231829		20.05	0.279736	0.231829	0.222659		20.05	0.210891	0.237696	0.210891		20.05	0.146473	0.116393	0.112968		20.05	0.130472	0.0899955	0.1015		20.05	0.123499	0.0794387	0.0740791		20.05	0.0687262	0.106872	0.113681		20.05	0.0740043	0.0639045	0.0965449		20.05	0.0483933	0.064034	0.0763756		20.05	0.0788584	0.0721864	0.0610668
25.05	0.316033	0.319491	0.279782		25.05	0.316033	0.279782	0.256557		25.05	0.270877	0.269259	0.270877		25.05	0.17758	0.172352	0.134113		25.05	0.172873	0.100363	0.10828		25.05	0.161403	0.0980758	0.0992378		25.05	0.103602	0.119873	0.125164		25.05	0.0884492	0.0721026	0.104282		25.05	0.0675378	0.0799399	0.0928458		25.05	0.073587	0.0705069	0.0717001
30.05	0.366837	0.346946	0.320535		30.05	0.366837	0.320535	0.314372		30.05	0.293714	0.338268	0.293714		30.05	0.192543	0.183156	0.161227		30.05	0.196962	0.122519	0.153062		30.05	0.186964	0.130738	0.120256		30.05	0.132843	0.135201	0.17758		30.05	0.102246	0.0861353	0.119065		30.05	0.0741149	0.101688	0.112656		30.05	0.0916737	0.0840193	0.0893824
35.05	0.404615	0.373646	0.36789		35.05	0.404615	0.36789	0.336709		35.05	0.315124	0.393139	0.315124		35.05	0.217059	0.202299	0.181947		35.05	0.18162	0.150097	0.16144		35.05	0.214882	0.138922	0.136579		35.05	0.135493	0.165103	0.164687		35.05	0.115944	0.0993425	0.144395		35.05	0.0879942	0.11483	0.126079		35.05	0.104455	0.0953516	0.110547
40.05	0.445125	0.405489	0.417683		40.05	0.445125	0.417683	0.413939		40.05	0.330071	0.385648	0.330071		40.05	0.248956	0.236837	0.204865		40.05	0.198416	0.152242	0.165032		40.05	0.214731	0.151339	0.167502		40.05	0.148108	0.161102	0.224845		40.05	0.12775	0.122237	0.160981		40.05	0.0970369	0.127751	0.147353		40.05	0.120787	0.102614	0.11032
45.05	0.489109	0.451789	0.445814		45.05	0.489109	0.445814	0.412424		45.05	0.362081	0.404214	0.362081		45.05	0.276781	0.238053	0.218069		45.05	0.21642	0.174304	0.182204		45.05	0.245938	0.171552	0.168495		45.05	0.149758	0.163137	0.216964		45.05	0.167824	0.130019	0.167863		45.05	0.109763	0.182346	0.154547		45.05	0.128298	0.11482	0.121656
50.05	0.542082	0.49698	0.48688		50.05	0.542082	0.48688	0.436616		50.05	0.396731	0.428515	0.396731		50.05	0.296705	0.281806	0.238952		50.05	0.238191	0.185942	0.208593		50.05	0.260599	0.175702	0.181739		50.05	0.146914	0.185206	0.245502		50.05	0.157657	0.15213	0.214546		50.05	0.118141	0.177073	0.167589		50.05	0.139313	0.133789	0.130459
55.05	0.574894	0.546918	0.526397		55.05	0.574894	0.526397	0.454386		55.05	0.43211	0.465329	0.43211		55.05	0.320148	0.279528	0.260644		55.05	0.251868	0.198905	0.227245		55.05	0.279623	0.191732	0.199219		55.05	0.159269	0.195061	0.240319		55.05	0.158264	0.160959	0.191828		55.05	0.136484	0.203734	0.206393		55.05	0.180925	0.147084	0.143112
60.05	0.622191	0.568093	0.568825		60.05	0.622191	0.568825	0.490263		60.05	0.459386	0.496289	0.459386		60.05	0.344186	0.297242	0.279053		60.05	0.269768	0.216075	0.240329		60.05	0.305072	0.206911	0.209572		60.05	0.175343	0.206536	0.263654		60.05	0.178539	0.168629	0.19999		60.05	0.160109	0.203563	0.19349		60.05	0.17682	0.159753	0.156977
65.05	0.662981	0.609677	0.608129		65.05	0.662981	0.608129	0.525548		65.05	0.493394	0.532135	0.493394		65.05	0.368782	0.318668	0.301277		65.05	0.283834	0.235574	0.260552		65.05	0.321641	0.220851	0.222664		65.05	0.18968	0.220906	0.282433		65.05	0.181308	0.179342	0.212605		65.05	0.161562	0.234069	0.214046		65.05	0.187781	0.181887	0.164835
70.05	0.705198	0.651026	0.651185		70.05	0.705198	0.651185	0.553461		70.05	0.528415	0.568403	0.528415		70.05	0.391057	0.351533	0.319747		70.05	0.303379	0.252455	0.276248		70.05	0.347491	0.243865	0.245914		70.05	0.211508	0.23705	0.290543		70.05	0.18573	0.190209	0.227062		70.05	0.172214	0.223788	0.224656		70.05	0.196286	0.185826	0.169818
75.05	0.746287	0.694088	0.695732		75.05	0.746287	0.695732	0.591418		75.05	0.562317	0.599369	0.562317		75.05	0.414904	0.364804	0.343309		75.05	0.321604	0.267962	0.293702		75.05	0.369451	0.255075	0.254637		75.05	0.217655	0.250997	0.308371		75.05	0.19498	0.203175	0.243385		75.05	0.187765	0.251988	0.235631		75.05	0.205121	0.202014	0.180905
80.05	0.786957	0.743055	0.739726		80.05	0.786957	0.739726	0.626686		80.05	0.598258	0.631297	0.598258		80.05	0.435395	0.393703	0.362199		80.05	0.340483	0.284122	0.299577		80.05	0.391538	0.288081	0.278576		80.05	0.233913	0.264225	0.328347		80.05	0.205675	0.206133	0.253625		80.05	0.193825	0.256685	0.243663		80.05	0.206591	0.204322	0.185913
85.05	0.822436	0.776752	0.785193		85.05	0.822436	0.785193	0.673223		85.05	0.63266	0.664024	0.63266		85.05	0.458298	0.411517	0.381974		85.05	0.374037	0.308095	0.322971		85.05	0.413149	0.296301	0.285749		85.05	0.24728	0.282885	0.336554		85.05	0.2165	0.216947	0.269466		85.05	0.206089	0.276268	0.254293		85.05	0.246999	0.213048	0.193798
90.05	0.860246	0.818351	0.827667		90.05	0.860246	0.827667	0.69753		90.05	0.666367	0.706063	0.666367		90.05	0.478162	0.432879	0.401148		90.05	0.388907	0.316339	0.334769		90.05	0.43656	0.315457	0.300604		90.05	0.262662	0.297779	0.353486		90.05	0.231448	0.230003	0.273406		90.05	0.218068	0.286589	0.268406		90.05	0.224267	0.232365	0.205081
95.05	0.898551	0.851684	0.872538		95.05	0.898551	0.872538	0.732999		95.05	0.701513	0.728524	0.701513		95.05	0.502737	0.457521	0.422119		95.05	0.39676	0.333567	0.350051		95.05	0.454603	0.329792	0.314484		95.05	0.275211	0.305915	0.377571		95.05	0.2399	0.249803	0.293456		95.05	0.229726	0.302911	0.281159		95.05	0.237866	0.224428	0.214007
100.05	0.940155	0.887925	0.914821		100.05	0.940155	0.914821	0.766224		100.05	0.737855	0.765309	0.737855		100.05	0.524947	0.480886	0.44024		100.05	0.418465	0.351174	0.367636		100.05	0.477366	0.346567	0.331111		100.05	0.283625	0.329153	0.38649		100.05	0.25221	0.25692	0.300972		100.05	0.242382	0.333255	0.293811		100.05	0.247587	0.234943	0.226967
105.05	0.975492	0.92379	0.959116		105.05	0.975492	0.959116	0.797021		105.05	0.77061	0.794262	0.77061		105.05	0.544589	0.504468	0.461552		105.05	0.428328	0.367533	0.382745		105.05	0.498042	0.365693	0.345268		105.05	0.296298	0.334416	0.403165		105.05	0.258129	0.267342	0.313871		105.05	0.252915	0.330803	0.307841		105.05	0.265849	0.245491	0.235244
110.05	1.01363	0.96154	1.00216		110.05	1.01363	1.00216	0.825089		110.05	0.804875	0.826823	0.804875		110.05	0.566834	0.528539	0.482243		110.05	0.442978	0.385022	0.398302		110.05	0.519667	0.382974	0.360855		110.05	0.310713	0.351336	0.418651		110.05	0.268825	0.264357	0.325526		110.05	0.264148	0.344651	0.321274		110.05	0.266295	0.255313	0.243515
115.05	1.04276	0.993321	1.04352		115.05	1.04276	1.04352	0.856532		115.05	0.836685	0.859108	0.836685		115.05	0.589575	0.549123	0.502097		115.05	0.458795	0.399727	0.415607		115.05	0.539625	0.393729	0.376458		115.05	0.317384	0.363952	0.434579		115.05	0.280311	0.272769	0.333279		115.05	0.275887	0.35568	0.335479		115.05	0.276089	0.273165	0.252742
120.05	1.08079	1.03027	1.0796		120.05	1.08079	1.0796	0.886641		120.05	0.866499	0.890979	0.866499		120.05	0.607993	0.571833	0.522436		120.05	0.47596	0.415833	0.431037		120.05	0.56483	0.409853	0.39134		120.05	0.329933	0.375245	0.451055		120.05	0.296031	0.287658	0.347103		120.05	0.286443	0.374907	0.34698		120.05	0.286554	0.274207	0.262038
					Q2					Q3					Q4					Q5					Q6					Q7					Q8					Q9					Q10
Quercetin mM		0					0.5					1					3					5					7.5					10					12.5					15					20
t(s)	1	2	3		t(s)	1	2	3		t(s)	1	2	3		t(s)	1	2	3		t(s)	1	2	3		t(s)	1	2	3		t(s)	1	2	3		t(s)	1	2	3		t(s)	1	2	3		t(s)	1	2	3
0.05	0.114727	0.0655351	0.0651541		0.05	0.151422	0.14441	0.123611		0.05	0.126673	0.158821	0.0794137		0.05	0.073236	0.0814085	0.0871661		0.05	0.0372941	0.0973065	0.064962		0.05	0.0201255	0.0654089	0.0829376		0.05	0.0350711	0.0347988	0.0279877		0.05	0.0254728	0.021724	0.0424488		0.05	0.0155196	0.0300026	0.0108134		0.05	-0.00471768	-0.00998751	-0.0295599
5.05	0.266964	0.166373	0.169515		5.05	0.328283	0.304271	0.251378		5.05	0.236651	0.318028	0.203243		5.05	0.170733	0.179388	0.181898		5.05	0.0860699	0.187809	0.157403		5.05	0.0562604	0.108517	0.103458		5.05	0.0761198	0.0543886	0.0673824		5.05	0.0405134	0.0492383	0.0511604		5.05	0.0218308	0.0439707	0.0416627		5.05	-0.000440252	0.0191268	-0.0101232
10.05	0.384194	0.250853	0.262257		10.05	0.46202	0.442849	0.358474		10.05	0.33823	0.446634	0.296278		10.05	0.238016	0.25945	0.267466		10.05	0.129677	0.288749	0.236809		10.05	0.0822713	0.139671	0.141438		10.05	0.0982607	0.0619255	0.0788245		10.05	0.058742	0.0481494	0.0780605		10.05	0.041047	0.046538	0.052951		10.05	0.0171164	0.0262599	-0.00139219
15.05	0.491045	0.334868	0.347426		15.05	0.574887	0.582631	0.452569		15.05	0.443795	0.557772	0.387158		15.05	0.304056	0.32394	0.350812		15.05	0.168919	0.377778	0.329667		15.05	0.102484	0.161718	0.194735		15.05	0.114678	0.0780829	0.0965409		15.05	0.078049	0.0627764	0.0984039		15.05	0.0558163	0.0563485	0.0694427		15.05	0.0179084	0.0500992	0.00636537
20.05	0.591009	0.400748	0.427179		20.05	0.695168	0.683641	0.542065		20.05	0.532056	0.659589	0.468712		20.05	0.374598	0.408171	0.451812		20.05	0.212504	0.463606	0.413797		20.05	0.128324	0.204792	0.239059		20.05	0.143444	0.0935995	0.140148		20.05	0.0809524	0.0809035	0.112922		20.05	0.0514675	0.06555	0.0798784		20.05	0.0251734	0.0466187	0.0109479
25.05	0.675097	0.464312	0.512686		25.05	0.790163	0.798153	0.647225		25.05	0.62524	0.749727	0.536236		25.05	0.437073	0.485797	0.533683		25.05	0.255347	0.548419	0.499514		25.05	0.166843	0.247472	0.271741		25.05	0.176507	0.113165	0.152687		25.05	0.0950487	0.0741009	0.126678		25.05	0.058071	0.0806147	0.0935359		25.05	0.0283046	0.0551013	0.0206912
30.05	0.738725	0.535414	0.571604		30.05	0.889631	0.915057	0.702668		30.05	0.715486	0.841404	0.609787		30.05	0.536896	0.547306	0.600907		30.05	0.307377	0.640815	0.587141		30.05	0.190901	0.271745	0.317032		30.05	0.191362	0.130579	0.180299		30.05	0.11863	0.0908566	0.139047		30.05	0.0738634	0.0930394	0.101249		30.05	0.0575032	0.0677181	0.02116
35.05	0.811336	0.5917	0.644599		35.05	0.972503	1.00205	0.782627		35.05	0.807606	0.93194	0.682077		35.05	0.581919	0.60642	0.681992		35.05	0.345331	0.715463	0.67187		35.05	0.219631	0.328708	0.370101		35.05	0.217089	0.159377	0.207963		35.05	0.120567	0.105742	0.158702		35.05	0.0984633	0.0995223	0.121607		35.05	0.0574316	0.083806	0.0464599
40.05	0.868676	0.658427	0.693195		40.05	1.05007	1.09111	0.845808		40.05	0.882944	1.00134	0.754975		40.05	0.651387	0.682067	0.761804		40.05	0.392482	0.781072	0.750791		40.05	0.245558	0.352891	0.416237		40.05	0.23578	0.173973	0.239117		40.05	0.128731	0.122422	0.166242		40.05	0.0890069	0.109804	0.126434		40.05	0.0722854	0.0932628	0.0454799
45.05	0.908281	0.691922	0.743971		45.05	1.11907	1.17985	0.908141		45.05	0.954483	1.07372	0.818811		45.05	0.69651	0.736814	0.81533		45.05	0.450448	0.853977	0.814704		45.05	0.275363	0.380821	0.466197		45.05	0.257082	0.187619	0.24895		45.05	0.155693	0.151184	0.200786		45.05	0.109816	0.117863	0.153311		45.05	0.0645713	0.0866312	0.0580108
50.05	0.961283	0.743219	0.799772		50.05	1.19073	1.26045	0.968534		50.05	1.01956	1.12816	0.897691		50.05	0.767515	0.80342	0.872837		50.05	0.474633	0.929325	0.894626		50.05	0.324029	0.401027	0.516189		50.05	0.29028	0.240039	0.271473		50.05	0.166389	0.153249	0.215756		50.05	0.121383	0.131175	0.165318		50.05	0.0724776	0.110208	0.0535288
55.05	0.97994	0.787399	0.843471		55.05	1.20153	1.30268	1.02623		55.05	1.07768	1.17478	0.915693		55.05	0.816752	0.865726	0.931377		55.05	0.51269	0.976185	0.968362		55.05	0.343424	0.448114	0.57193		55.05	0.325022	0.239142	0.271269		55.05	0.175503	0.171753	0.214792		55.05	0.118085	0.1532	0.185514		55.05	0.0855777	0.107419	0.0499564
60.05	1.00948	0.810534	0.881231		60.05	1.25465	1.3732	1.08086		60.05	1.14498	1.21265	0.948167		60.05	0.870182	0.921001	0.990709		60.05	0.555651	1.02986	1.00667		60.05	0.36652	0.460453	0.594659		60.05	0.33196	0.259123	0.288355		60.05	0.186679	0.182958	0.21927		60.05	0.120445	0.142086	0.196181		60.05	0.0744857	0.123119	0.0668089
65.05	1.03499	0.846033	0.912333		65.05	1.30561	1.40493	1.12975		65.05	1.18835	1.2495	0.991133		65.05	0.929661	0.978064	1.04719		65.05	0.579769	1.08768	1.06771		65.05	0.399697	0.493285	0.654484		65.05	0.361846	0.274565	0.307642		65.05	0.195671	0.199665	0.246915		65.05	0.130689	0.146286	0.185321		65.05	0.096323	0.110267	0.0640432
70.05	1.05603	0.882043	0.948109		70.05	1.31293	1.45484	1.17535		70.05	1.24088	1.28347	1.03766		70.05	0.97634	1.03501	1.09177		70.05	0.627996	1.14119	1.10117		70.05	0.436562	0.51604	0.683511		70.05	0.379664	0.293292	0.328313		70.05	0.204218	0.230577	0.256417		70.05	0.134955	0.152127	0.189482		70.05	0.09478	0.119847	0.0723427
75.05	1.07253	0.91116	0.985605		75.05	1.33737	1.48299	1.21347		75.05	1.28175	1.31932	1.05185		75.05	1.01786	1.09152	1.13561		75.05	0.650847	1.1786	1.15127		75.05	0.476559	0.546997	0.729975		75.05	0.410943	0.316437	0.356643		75.05	0.210174	0.238739	0.269379		75.05	0.146855	0.157629	0.204775		75.05	0.08625	0.122157	0.0808876
80.05	1.08353	0.925408	1.00925		80.05	1.36097	1.51918	1.25265		80.05	1.31496	1.34023	1.08097		80.05	1.07484	1.1301	1.18195		80.05	0.690485	1.22077	1.19647		80.05	0.495891	0.575835	0.771606		80.05	0.4375	0.327979	0.37135		80.05	0.216335	0.247185	0.279245		80.05	0.148149	0.160427	0.223128		80.05	0.105566	0.136309	0.0813675
85.05	1.10112	0.946888	1.02835		85.05	1.38629	1.54859	1.27797		85.05	1.34055	1.37328	1.11432		85.05	1.10617	1.18499	1.23015		85.05	0.724387	1.26009	1.23784		85.05	0.528979	0.600414	0.806174		85.05	0.459489	0.355198	0.405887		85.05	0.23151	0.262114	0.291279		85.05	0.154835	0.16674	0.232957		85.05	0.0991979	0.140384	0.0866447
90.05	1.10966	0.958086	1.04609		90.05	1.40442	1.57923	1.30456		90.05	1.37129	1.39214	1.13163		90.05	1.15564	1.22895	1.25439		90.05	0.755351	1.29792	1.28221		90.05	0.549219	0.637981	0.850941		90.05	0.478142	0.380828	0.413412		90.05	0.243433	0.280189	0.313283		90.05	0.15615	0.182507	0.231331		90.05	0.103313	0.137407	0.0966287
95.05	1.11772	0.975202	1.05679		95.05	1.42547	1.58844	1.33457		95.05	1.39363	1.40954	1.15943		95.05	1.178	1.27297	1.28464		95.05	0.792329	1.32437	1.30386		95.05	0.583068	0.673459	0.884173		95.05	0.50157	0.395653	0.439844		95.05	0.258303	0.294973	0.322646		95.05	0.161257	0.180567	0.242566		95.05	0.11394	0.143939	0.0939772
100.05	1.12882	0.993218	1.07775		100.05	1.43817	1.59982	1.34771		100.05	1.41809	1.42942	1.17873		100.05	1.2217	1.29005	1.31287		100.05	0.815895	1.36254	1.34844		100.05	0.611298	0.684598	0.913984		100.05	0.526629	0.414593	0.461455		100.05	0.263266	0.31332	0.341044		100.05	0.16899	0.193898	0.25474		100.05	0.121432	0.154525	0.0998635
105.05	1.13251	1.00596	1.08741		105.05	1.46667	1.62228	1.37173		105.05	1.44018	1.44844	1.18819		105.05	1.25057	1.32468	1.34111		105.05	0.857303	1.39032	1.36553		105.05	0.6401	0.706211	0.947422		105.05	0.546725	0.440424	0.492387		105.05	0.274598	0.330338	0.36109		105.05	0.169483	0.192418	0.277208		105.05	0.120982	0.155858	0.106183
110.05	1.14056	1.03092	1.10109		110.05	1.46163	1.63488	1.37836		110.05	1.46352	1.46038	1.20651		110.05	1.28141	1.37887	1.37705		110.05	0.87831	1.41652	1.40811		110.05	0.661797	0.730154	0.98155		110.05	0.565143	0.459031	0.507682		110.05	0.28666	0.352962	0.378824		110.05	0.176332	0.204302	0.270325		110.05	0.121231	0.163408	0.114584
115.05	1.15147	1.02385	1.1143		115.05	1.46142	1.65834	1.39549		115.05	1.47182	1.48214	1.21829		115.05	1.3165	1.38327	1.39389		115.05	0.900122	1.44319	1.4266		115.05	0.689259	0.753486	1.01592		115.05	0.595034	0.481311	0.523216		115.05	0.297893	0.366346	0.385978		115.05	0.181907	0.207884	0.283803		115.05	0.128534	0.168823	0.114693
120.05	1.15525	1.03366	1.12113		120.05	1.46995	1.66579	1.40999		120.05	1.4948	1.48397	1.22872		120.05	1.34065	1.40302	1.41661		120.05	0.929118	1.46137	1.47106		120.05	0.714007	0.775882	1.0477		120.05	0.613196	0.504627	0.54727		120.05	0.314293	0.384555	0.402898		120.05	0.188979	0.228093	0.296199		120.05	0.135269	0.1744	0.11908
mor 1					mor 2					mor 3					mor 4					mor 5					mor 6					mor 7					mor 8					mor 9					MOR 10
Morin mM		0.1					0.5					1					3					5					10					12.5					15					29					30
t(s)	1	2	3		t(s)	1	2	3		t(s)	1	2	3		t(s)	1	2	3		t(s)	1	2	3		t(s)	1	2	3		t(s)	1	2	3		t(s)	1	2	3		t(s)	1	2	3		t(s)	1	2	3
0.05	0.0258012	0.0149306	0.0382073		0.05	0.0277179	-0.00284109	0.0171783		0.05	0.0100685	0.0258012	0.0461266		0.05	0.0100321	0.0258012	0.0298255		0.05	0.0314004	0.0393019	0.0428274		0.05	0.0248237	0.0694642	0.0239721		0.05	0.019589	0.0228922	0.00538824		0.05	0.00687364	0.0202615	0.0144393		0.05	0.0186331	0.00816309	0.00233333		0.05	-0.0423327	0.0121847	-0.00811623
5.05	0.0701179	0.0164673	0.0424821		5.05	0.0468684	0.00314543	0.02001		5.05	0.044939	0.0701179	0.0726487		5.05	0.0332877	0.0701179	0.0457335		5.05	0.0356227	0.0360034	0.0624473		5.05	0.0392059	0.0552853	0.0430641		5.05	0.0398426	0.0471986	0.0361727		5.05	0.0208272	0.0446939	0.0191347		5.05	0.0149952	0.0124185	0.0176364		5.05	-0.0406259	0.0333184	0.00748202
10.05	0.0691355	0.0465626	0.0696319		10.05	0.0834763	0.0324186	0.0440633		10.05	0.105433	0.0691355	0.108571		10.05	0.0609847	0.0691355	0.0531947		10.05	0.0547111	0.0688491	0.0725311		10.05	0.0640295	0.0616302	0.0361998		10.05	0.0953254	0.0844845	0.0274032		10.05	0.0305064	0.0550773	0.0446875		10.05	0.0491264	0.0418966	0.029904		10.05	-0.0510666	0.0256222	0.00624555
15.05	0.111735	0.092731	0.0848925		15.05	0.0857007	0.0449932	0.0667161		15.05	0.124061	0.111735	0.132287		15.05	0.0675092	0.111735	0.0729954		15.05	0.0638965	0.0665982	0.0962727		15.05	0.0666829	0.107828	0.0435578		15.05	0.126185	0.0848317	0.0393335		15.05	0.0518292	0.0579707	0.0487407		15.05	0.0384611	0.038835	0.0398167		15.05	-0.0533331	0.0191162	0.0241714
20.05	0.125732	0.0938552	0.10101		20.05	0.14083	0.0777987	0.0724575		20.05	0.124929	0.125732	0.17517		20.05	0.114915	0.125732	0.102239		20.05	0.0810957	0.0844231	0.0995038		20.05	0.0918016	0.127152	0.0750163		20.05	0.151972	0.0775649	0.0644082		20.05	0.0926923	0.0784364	0.0556841		20.05	0.0605847	0.0554368	0.0457396		20.05	-0.0560434	0.00311239	0.021712
25.05	0.137803	0.138152	0.122364		25.05	0.16454	0.105019	0.0806727		25.05	0.13938	0.137803	0.18018		25.05	0.12269	0.137803	0.102059		25.05	0.0943555	0.113995	0.136362		25.05	0.0972922	0.128248	0.0859653		25.05	0.151513	0.0978144	0.0681021		25.05	0.0770159	0.0814662	0.0984146		25.05	0.067245	0.0575593	0.0477793		25.05	-0.0455429	0.00762352	0.00534945
30.05	0.153882	0.0945736	0.129072		30.05	0.146466	0.100791	0.102111		30.05	0.176897	0.153882	0.170104		30.05	0.148579	0.153882	0.116161		30.05	0.101772	0.147595	0.137827		30.05	0.128301	0.119109	0.110284		30.05	0.129748	0.114432	0.0717789		30.05	0.0992709	0.0851985	0.0822595		30.05	0.0925137	0.0799524	0.0904565		30.05	-0.0312292	0.00764991	0.0331187
35.05	0.160417	0.111322	0.142639		35.05	0.121414	0.118595	0.093674		35.05	0.184542	0.160417	0.167143		35.05	0.126472	0.160417	0.114784		35.05	0.119735	0.136101	0.159418		35.05	0.0987009	0.1283	0.121044		35.05	0.147908	0.13118	0.0849269		35.05	0.105931	0.0954658	0.11041		35.05	0.0727395	0.081187	0.0848827		35.05	-0.0188979	0.025272	0.0544773
40.05	0.16386	0.119524	0.16125		40.05	0.141751	0.133587	0.106344		40.05	0.190098	0.16386	0.175251		40.05	0.137182	0.16386	0.130517		40.05	0.139441	0.155465	0.145274		40.05	0.111624	0.130309	0.115701		40.05	0.151709	0.116123	0.0971839		40.05	0.10313	0.112729	0.106732		40.05	0.0957833	0.0680292	0.0803364		40.05	-0.028506	0.0340069	0.02541
45.05	0.176047	0.132897	0.17543		45.05	0.139932	0.148212	0.115653		45.05	0.207281	0.176047	0.191078		45.05	0.152645	0.176047	0.139462		45.05	0.152083	0.144905	0.16292		45.05	0.125304	0.143485	0.128765		45.05	0.153427	0.110477	0.110218		45.05	0.131772	0.10404	0.0897806		45.05	0.0856805	0.0560448	0.0737503		45.05	-0.0279387	0.0292307	0.0294841
50.05	0.190333	0.149522	0.191714		50.05	0.146077	0.16468	0.128295		50.05	0.222482	0.190333	0.217239		50.05	0.163331	0.190333	0.154797		50.05	0.15749	0.156124	0.179812		50.05	0.137574	0.158596	0.12115		50.05	0.151828	0.138804	0.117507		50.05	0.120449	0.100082	0.0945675		50.05	0.0762553	0.0569062	0.0738841		50.05	-0.0266774	0.0289616	0.0534086
55.05	0.202204	0.165513	0.207519		55.05	0.157553	0.183467	0.138959		55.05	0.236561	0.202204	0.212721		55.05	0.177039	0.202204	0.167353		55.05	0.17668	0.178871	0.180197		55.05	0.137436	0.169996	0.131376		55.05	0.157301	0.132954	0.134422		55.05	0.131945	0.109716	0.109475		55.05	0.0664422	0.0690195	0.0801228		55.05	-0.0243371	0.033445	0.0383261
60.05	0.216567	0.178287	0.225462		60.05	0.169661	0.199203	0.154111		60.05	0.250141	0.216567	0.223796		60.05	0.192678	0.216567	0.180321		60.05	0.19148	0.182847	0.191889		60.05	0.147305	0.184607	0.141229		60.05	0.169908	0.139685	0.144067		60.05	0.141249	0.120999	0.118833		60.05	0.0736453	0.0749524	0.0871559		60.05	-0.019858	0.0359224	0.031633
65.05	0.232466	0.191829	0.23749		65.05	0.179406	0.21658	0.163623		65.05	0.264413	0.232466	0.239785		65.05	0.20386	0.232466	0.1935		65.05	0.205681	0.197517	0.197352		65.05	0.165013	0.198668	0.154307		65.05	0.189605	0.1496	0.167383		65.05	0.157753	0.129791	0.122747		65.05	0.0797855	0.0805694	0.0997024		65.05	-0.0159085	0.0355386	0.0362007
70.05	0.247436	0.209114	0.253285		70.05	0.188245	0.233958	0.174207		70.05	0.279295	0.247436	0.263538		70.05	0.213204	0.247436	0.20617		70.05	0.22093	0.208943	0.209012		70.05	0.170114	0.226044	0.165595		70.05	0.196025	0.166683	0.162557		70.05	0.161859	0.147646	0.129395		70.05	0.0944097	0.0786007	0.101908		70.05	-0.0140609	0.0498613	0.0402713
75.05	0.25892	0.22201	0.282127		75.05	0.209515	0.246939	0.207146		75.05	0.292534	0.25892	0.264396		75.05	0.229298	0.25892	0.220977		75.05	0.234252	0.22373	0.221717		75.05	0.181204	0.22544	0.212054		75.05	0.207019	0.178622	0.175786		75.05	0.174861	0.147198	0.138408		75.05	0.087922	0.0929223	0.112842		75.05	-0.010626	0.0395855	0.0471017
80.05	0.27522	0.239061	0.297013		80.05	0.210964	0.263715	0.199051		80.05	0.307082	0.27522	0.279424		80.05	0.241792	0.27522	0.232527		80.05	0.245736	0.236641	0.229072		80.05	0.190757	0.235688	0.224415		80.05	0.219469	0.180974	0.187641		80.05	0.18517	0.169702	0.147511		80.05	0.0801675	0.0946655	0.136206		80.05	-0.00687033	0.0428531	0.0578803
85.05	0.293702	0.252734	0.312869		85.05	0.223292	0.279544	0.208397		85.05	0.329639	0.293702	0.291845		85.05	0.253903	0.293702	0.243053		85.05	0.258806	0.250712	0.23967		85.05	0.201789	0.245474	0.233271		85.05	0.230653	0.189518	0.1995		85.05	0.19771	0.158182	0.157397		85.05	0.0853792	0.0975151	0.125517		85.05	-0.00531461	0.0474778	0.0728294
90.05	0.304036	0.264565	0.33552		90.05	0.237407	0.29487	0.221412		90.05	0.340116	0.304036	0.306369		90.05	0.269125	0.304036	0.242611		90.05	0.275918	0.265114	0.250271		90.05	0.211647	0.256465	0.244897		90.05	0.243105	0.199807	0.21191		90.05	0.209091	0.184686	0.183051		90.05	0.0978413	0.102193	0.131087		90.05	-0.00232366	0.0508784	0.0652634
95.05	0.322275	0.279154	0.349035		95.05	0.246598	0.312046	0.231524		95.05	0.361982	0.322275	0.32324		95.05	0.283556	0.322275	0.255992		95.05	0.280225	0.28077	0.256446		95.05	0.223388	0.270235	0.254759		95.05	0.257572	0.210055	0.223339		95.05	0.219918	0.178425	0.179098		95.05	0.0937432	0.109666	0.139663		95.05	0.00207055	0.0509356	0.0765418
100.05	0.337624	0.297506	0.363184		100.05	0.240585	0.324078	0.242528		100.05	0.368747	0.337624	0.332817		100.05	0.296847	0.337624	0.267936		100.05	0.29457	0.294159	0.267111		100.05	0.234285	0.281473	0.266441		100.05	0.268496	0.219853	0.235681		100.05	0.229359	0.178532	0.188956		100.05	0.104554	0.114675	0.159084		100.05	0.0047675	0.0528322	0.0835227
105.05	0.352834	0.310297	0.375954		105.05	0.250262	0.340302	0.255887		105.05	0.38127	0.352834	0.345908		105.05	0.311323	0.352834	0.283608		105.05	0.308299	0.30599	0.279176		105.05	0.244149	0.293077	0.277647		105.05	0.279492	0.230826	0.247446		105.05	0.240331	0.187877	0.208853		105.05	0.104317	0.118958	0.151152		105.05	0.0101109	0.0554855	0.088888
110.05	0.368848	0.324718	0.392643		110.05	0.259789	0.358455	0.266536		110.05	0.393829	0.368848	0.357063		110.05	0.323434	0.368848	0.297029		110.05	0.321701	0.317684	0.289097		110.05	0.254946	0.304585	0.287121		110.05	0.294623	0.241542	0.258195		110.05	0.25258	0.196884	0.20527		110.05	0.113562	0.124238	0.157976		110.05	0.0145304	0.0570767	0.0967002
115.05	0.384214	0.339481	0.406089		115.05	0.276434	0.37268	0.27896		115.05	0.424907	0.384214	0.37007		115.05	0.338375	0.384214	0.309467		115.05	0.334633	0.331276	0.297532		115.05	0.264327	0.315346	0.289371		115.05	0.305125	0.249638	0.269117		115.05	0.263365	0.204789	0.214851		115.05	0.116225	0.133557	0.164252		115.05	0.0203297	0.0526069	0.0913185
120.05	0.403401	0.353123	0.42111		120.05	0.28851	0.387565	0.290593		120.05	0.451329	0.403401	0.382133		120.05	0.350168	0.403401	0.320896		120.05	0.351553	0.346326	0.30954		120.05	0.306175	0.320569	0.30141		120.05	0.311823	0.261136	0.279179		120.05	0.274884	0.21663	0.22461		120.05	0.120453	0.138642	0.170313		120.05	0.0164667	0.0545382	0.109972
													Average (n=3) residual activity of TLH vs flavonoid. Data were adjutes to Dose-Reponse model in Prism GraphPad software
													Quercetin		Morin		EGCG
												concentration (mM)	Avg activity	SD	Avg activity	SD	Avg activity	SD
												0	100	7.85428	100	3.28033	100	8.98135
												100	100	7.85428	100	3.28033	100	8.98135
												500	100	13.9973	100	11.367	99.3906	9.82097
												1000	89.6737	8.53407	98.3363	8.41829	83.1937	5.4632
												3000	74.5109	5.94915	84.5487	7.07622	55.3201	6.02304
												5000	36.6694	3.28452	69.712	6.27963	N.I	----
												7000	N.I	----	N.I	---	41.306	6.6503
												10000	23.0251	7.91343	50.1251	7.82449	39.6919	9.91863
												12500	14.7112	3.1158	42.9585	7.75188	N.I	----
												15000	11.7579	2.38981	38.6151	0.459666	33.642	5.17795
												20000	9.28235	1.28296	26.267	3.83411	32.2285	5.52267
												30000	8.71969	1.95867	13.3207	4.41137	27.9995	2.25366
												50000	5.70149	2.01639	10.0855	7.57811	23.3425	2.93201
													N.I. not included in analysis
[truncated: 8 more columns]

## Sheet: Fig6_Flavonoids
Final absorbance at 410 nm (average)									Average (n=3) residual activity of TLH vs flavonoids
	Quercetin	EGCG	Morin					control		Quercetin		EGCG		Morin
Concentration (mM)	1	2	3				concentration (mM)	Enz Act.	SD	Act. Enz	SD	Act. Enz	SD	Act. Enz	SD
1	0.436443	0.452325	0.450055				0	100	2.84225	N.D		N.D		N.D
5	0.430526	0.413769	0.429199				1			105.933	7.38819	109.788	11.0905	109.237	5.56644
10	0.376323	0.397602	0.417307				5			104.497	11.1947	100.429	6.72913	104.175	4.72978
15	0.346888	0.365267	0.39254				10			91.3406	12.6174	96.5053	9.20993	101.288	6.79879
20	0.300155	0.298975	0.352834				15			84.1961	7.85564	88.657	5.16161	95.2767	1.3157
							20			72.853	13.9933	72.5668	2.93503	85.6393	7.87994
Nota: Absorbance was recorded after 1hr incubation as described in Methods section.
